# Supplementary material for: Suppressing electron-phonon coupling in organic photovoltaics for high-efficiency power conversion
Source: PubMed Central journal article supplement (PMC10442373; doi:10.1038/s41467-023-40806-9), 2023-08-21
Supplement: 41467_2023_40806_MOESM1_ESM.pdf [file 41467_2023_40806_MOESM1_ESM.pdf]

## Supplementary information

# Suppressing Electron-Phonon Coupling in Organic Photovoltaics for High-Efficiency Power Conversion

Yuanyuan Jiang,<sup>1,2,4</sup> Yixin Li,<sup>1,4</sup> Feng Liu,<sup>1,4</sup> Wenxuan Wang,<sup>1,2</sup> Wenli Su,<sup>3</sup> Wuyue Liu,<sup>1</sup> Songjun Liu,<sup>1,2</sup> Wenkai Zhang,<sup>3</sup> Jianhui Hou,<sup>1,2</sup> Shengjie Xu,<sup>1\*</sup> Yuanping Yi<sup>1\*</sup> & Xiaozhang Zhu<sup>1,2\*</sup>

<sup>1</sup>Beijing National Laboratory for Molecular Sciences, CAS Key Laboratory of Organic Solids, Institute of Chemistry, Chinese Academy of Sciences, Beijing 100190, China

<sup>2</sup>School of Chemical Sciences, University of Chinese Academy of Sciences, Beijing 100049, China

<sup>3</sup>Department of Physics and Applied Optics, Beijing Area Major Laboratory Center for Advanced Quantum Studies, Beijing Normal University, Beijing 100875, China.

<sup>4</sup>These authors contributed equally: Yuanyuan jiang, Yixin Li, Feng Liu

For correspondence: [\\*xushengjie@iccas.ac.cn](mailto:*xushengjie@iccas.ac.cn), [\\*ypyi@iccas.ac.cn](mailto:*ypyi@iccas.ac.cn),

[\\*xzzhu@iccas.ac.cn](mailto:*xzzhu@iccas.ac.cn)

## **Contents**

- 1. Materials and Synthesis Procedures**
- 2. Supplementary Figures**
- 3. Supplementary Tables**

## 1. Materials and Synthesis Procedures

### General Methods

All reactions involving air- or moisture-sensitive compounds were carried out in a dry reaction vessel under a positive pressure of nitrogen. **AQx-2** was prepared according to our published procedures (*Adv. Mater.*, **2020**, *32*, 1906324).  $^1\text{H}$  and  $^{13}\text{C}$  spectra were measured with Bruker Avance 400 spectrometers. Chemical shifts for hydrogens are reported in parts per million (ppm, scale) downfield from tetramethylsilane and are referenced to the residual protons in the NMR solvent ( $\text{CDCl}_3$ : 7.26).  $^{13}\text{C}$  NMR spectra were recorded at 100 MHz. Chemical shifts for carbons are reported in parts per million (ppm, scale) downfield from tetramethylsilane and are referenced to the carbon resonance of the solvent ( $\text{CDCl}_3$ : 77.2). The data are presented as follows: chemical shift, multiplicity (s = singlet, d = doublet, t = triplet, m = multiplet and/or multiple resonances, br = broad), coupling constant in hertz (Hz), and integration. MALDI measurements were performed with a MALDI-FT 9.4 T, Bruker solariX, or MALDI-TOF MS Bruker Autoflex III. UV-vis was recorded with Jasco V-570 spectrometers. Cyclic voltammetry (CV) was performed with a CHI620D potentiostat. All measurements were carried out in a one-compartment cell under a nitrogen atmosphere, equipped with a glassy-carbon electrode, a platinum counter-electrode, and an  $\text{Ag}/\text{Ag}^+$  reference electrode with a scan rate of 100 mV/s. The supporting electrolyte was a 0.1 mol/L dichloromethane solution of tetrabutylammonium perchlorate (TBAP). All potentials were corrected against  $\text{Fc}/\text{Fc}^+$ . Single crystals were grown through slow diffusion of ethanol to its chloroform solution.

**Compound 2.** Compound 1 (0.374 g, 0.5 mmol) was dissolved in 20 mL N,N-dimethylformamide (DMF) and added 1-Bromo-2-ethylhexane (0.145 g, 0.75 mmol, 1.5 eq.) and Potassium carbonate ( $K_2CO_3$ , 0.345 g, 2.5 mmol, 5 eq.) under a nitrogen atmosphere. The reaction mixture was then heated at 80 °C for two hours, quenched by addition of water and extracted with ethyl acetate. The combined extracts were washed with brine, and then filtered and collected solvent. The solvent was removed by rotary evaporation to give the crude product, which was further purified by column chromatography on silica gel to afford compound 2 as a red brown solid (0.301 g, 70%).  $^1H$  NMR (400 MHz,  $CDCl_3$ ):  $\delta$  8.09 (s, 1H), 6.83 (m, 2H), 3.80 (m, 2H), 2.60 (m, 4H), 1.20–0.50 (m, 57H);  $^{13}C$  NMR (100 MHz,  $CDCl_3$ ):  $\delta$  147.0, 146.6, 142.0, 141.6, 136.6, 136.4, 134.9, 131.6, 127.0, 126.8, 122.4, 122.1, 121.9, 119.8, 119.1, 118.9, 109.4, 108.9, 52.4, 41.6, 39.4, 39.1, 38.9, 38.8, 37.0, 36.6, 36.5, 36.4, 34.5, 34.3, 33.1, 32.4, 32.0, 31.1, 30.3, 30.0, 29.9, 29.7, 29.6, 29.5, 29.4, 29.0, 28.7, 28.4, 28.0, 27.9, 27.5, 27.4, 27.3, 27.2, 27.1, 27.0, 26.6, 26.3, 25.3, 24.7, 23.1, 23.0, 22.7, 22.3, 20.4, 20.2, 19.7, 19.3, 19.2, 18.1, 14.5, 14.2, 14.1, 11.5, 11.4, 11.2, 11.0; MS (MALDI-TOF)  $C_{48}H_{66}N_4S_5$  [M]<sup>+</sup>: 858.3.

**Compound 3.** Compound 2 (0.25 g, 0.29 mmol) was dissolved in 15 mL DMF and added 2-hexyldecylbromide (0.442 g, 1.45 mmol, 5 eq.) and potassium carbonate ( $K_2CO_3$ , 0.4 g, 2.9 mmol, 10 eq.) under a nitrogen atmosphere. The reaction mixture was then heated at 140 °C for four hours, quenched by addition of water and extracted with ethyl acetate. The combined extracts were washed with brine, and then filtered and collected solvent. The solvent was removed by rotary evaporation to give the crude

product, which was then dissolved in anhydrous acetic acid (15 mL) and added zinc powder (0.188 g, 2.9 mmol, 10 eq.) under a nitrogen atmosphere. The reaction mixture was then heated to reflux for one hour, After the solution was cooled to room temperature, the solid was removed by filtration. The mixture solution was added with water, extracted with ethyl acetate and sodium hydroxide solution until the organic layer was basic. The combined organic layer was dried over MgSO<sub>4</sub>. After removal of the solvent under reduced pressure, a blown liquid was obtained without further purification. To solution of blown liquid and glyoxal solution (0.29 mmol, 40 wt.% in water) in 20 mL ethanol, the mixture solution was stirred at room temperature for two hours. The solvent was evaporated, and the residue was purified on a silica-gel column to give compound 3 (0.087 g, 28%, three steps). <sup>1</sup>H NMR (400 MHz, CDCl<sub>3</sub>): δ 8.93 (s, 2H), 7.02 (s, 1H), 7.01 (s, 1H), 4.68 (m, 4H), 2.85 (m, 4H), 2.11 (m, 2H), 1.88 (m, 4H), 1.50-0.50 (m, 82H); <sup>13</sup>C NMR (100 MHz, CDCl<sub>3</sub>): δ 143.0, 141.4, 137.6, 137.5, 136.9, 136.4, 130.9, 130.8, 123.7, 123.6, 122.0, 121.9, 119.1, 117.7, 55.0, 55.0, 40.0, 39.0, 38.8, 38.6, 36.5, 34.3, 31.9, 31.8, 31.6, 30.4, 30.0, 29.9, 29.7, 29.6, 29.5, 29.4, 29.3, 29.2, 29.1, 29.0, 28.0, 27.9, 27.7, 27.3, 27.2, 26.8, 26.5, 25.5, 25.4, 23.1, 22.8, 22.7, 22.6, 22.5, 22.4, 19.2, 15.4, 14.4, 14.1, 14.0, 13.7, 11.4, 10.1; MS (MALDI-TOF) C<sub>66</sub>H<sub>100</sub>N<sub>4</sub>S<sub>4</sub> [M]<sup>+</sup>: 1076.5.

**Compound 4.** Compound 3 (0.080 g, 0.074 mmol) was dissolved in 10 mL anhydrous THF under nitrogen atmosphere and cooled to -78 °C, then LDA (1 M in THF, 0.3 mL, 0.3 mmol) was added by using a syringe under stirring. After stirring at -78 °C for 2 hours, DMF (0.1 mL) was added and the mixture was stirred at -78 °C for 30 min. The

reaction solution was warmed to room temperature for 30 min, then poured into water and extracted three times with CH<sub>2</sub>Cl<sub>2</sub>. The organic layer was separated, dried over MgSO<sub>4</sub>, and concentrated under reduced pressure. The residue was purified by silica-gel column chromatography to give compound 4 (0.078 g, 93%). <sup>1</sup>H NMR (400 MHz, CDCl<sub>3</sub>): δ 10.15 (s, 2H), 8.96 (s, 2H), 4.69 (m, 4H), 3.20 (m, 4H), 2.08 (m, 2H), 1.94 (m, 4H), 1.50-0.50 (m, 82H); <sup>13</sup>C NMR (100 MHz, CDCl<sub>3</sub>): δ 181.8, 146.9, 144.1, 142.2, 137.3, 137.2, 136.9, 136.6, 132.0, 131.9, 129.7, 129.6, 126.8, 126.8, 119.4, 118.4, 118.4, 65.8, 55.3, 55.2, 40.6, 40.2, 38.9, 38.6, 36.6, 34.3, 31.9, 31.9, 31.7, 31.5, 31.0, 30.7, 30.4, 30.1, 29.8, 29.7, 29.7, 29.6, 29.5, 29.4, 29.3, 29.2, 29.1, 28.5, 28.3, 28.1, 27.9, 27.6, 27.5, 26.9, 26.8, 25.5, 23.1, 22.7, 22.6, 22.5, 22.4, 19.1, 14.1, 13.9, 13.7, 11.4, 10.1; MS (MALDI-TOF) C<sub>68</sub>H<sub>100</sub>N<sub>4</sub>O<sub>2</sub>S<sub>4</sub> [M]<sup>+</sup>: 1133.5.

**Compound AQx-6.** INCN-2F (76 mg, 0.33 mmol) and compound 4 (75 mg, 0.066 mmol) were added to a solvent mixture of chloroform (10 mL) and pyridine (5 drops). The reaction was placed in an oil bath at 65 °C and was stirred for overnight. Removed solvent by reduced pressure and the residue was purified on a silica-gel column chromatography using chloroform as eluent to give AQx-6 as black solid (95 mg, 92%). <sup>1</sup>H NMR (400 MHz, CDCl<sub>3</sub>): δ 9.13 (s, 1H), 9.11 (s, 1H), 8.92 (m, 2H), 8.50 (m, 2H), 7.70 (m, 2H), 4.84 (m, 4H), 3.22 (m, 4H), 2.20 (m, 2H), 1.87 (m, 4H), 1.50-0.50 (m, 82H); <sup>13</sup>C NMR (150 MHz, CDCl<sub>3</sub>): δ 186.2, 155.7, 155.6, 154.1, 153.2, 153.0, 146.2, 142.8, 138.2, 138.2, 136.9, 136.7, 136.2, 136.1, 135.3, 135.2, 134.6, 133.2, 133.1, 133.0, 130.6, 130.4, 119.8, 119.7, 119.6, 115.0, 114.8, 114.6, 112.5, 112.3, 68.5, 55.7, 40.5, 39.2, 38.9, 38.7, 36.8, 36.4, 34.4, 34.3, 31.9, 31.8, 31.6, 31.5, 31.4, 30.6, 30.2,

29.9, 29.8, 29.7, 29.6, 29.5, 29.4, 29.3, 29.2, 29.1, 28.0, 27.9, 27.8, 27.7, 27.3, 25.7, 25.6, 23.3, 22.9, 22.7, 22.7, 22.6, 22.5, 20.2, 19.6, 19.2, 14.4, 14.1, 14.0, 13.8, 11.4, 10.3; HRMS (MALDI-TOF) calcd for C<sub>92</sub>H<sub>104</sub>F<sub>4</sub>N<sub>8</sub>O<sub>2</sub>S<sub>4</sub> [M]<sup>+</sup>: 1556.7107, found, 1556.7113.

**Compound AQx-8.** The synthesis process of AQx-8 refers to the synthesis method of AQx-2 that we have reported (*Adv. Mater.*, **2020**, *32*, 1906324). <sup>1</sup>H NMR (400 MHz, CDCl<sub>3</sub>): δ 9.19 (s, 2H), 8.98 (s, 2H), 8.58 (m, 2H), 7.70 (t, <sup>3</sup>J = 7.2 Hz, 2H), 4.80 (m, 4H), 3.25 (m, 4H), 2.15 (m, 2H), 1.88 (m, 4H), 1.50-0.50 (m, 98H); <sup>13</sup>C NMR (101 MHz, CDCl<sub>3</sub>): δ 186.1, 158.9, 155.7, 155.7 154.1, 153.1, 153.1, 153.0, 152.9, 146.2, 142.8, 138.1, 136.9, 136.6, 136.6, 136.2, 135.3, 134.5, 133.2, 133.2, 130.7, 119.7, 119.5, 115.1, 115.0, 114.8, 114.6, 112.5, 112.3, 68.4, 55.6, 39.1, 31.9, 31.8, 31.6, 31.5, 31.4, 30.5, 29.9, 29.9, 29.8, 29.7, 29.7, 29.6, 29.5, 29.5, 29.5, 29.4, 29.4, 29.2, 25.6, 25.5, 22.7, 22.6, 22.5, 14.1, 14.1, 14.0; HRMS (MALDI-TOF) calcd for C<sub>100</sub>H<sub>120</sub>F<sub>4</sub>N<sub>8</sub>O<sub>2</sub>S<sub>4</sub> [M]<sup>+</sup>: 1668.8348, found, 1668.8335.

## 2. Supplementary Figures

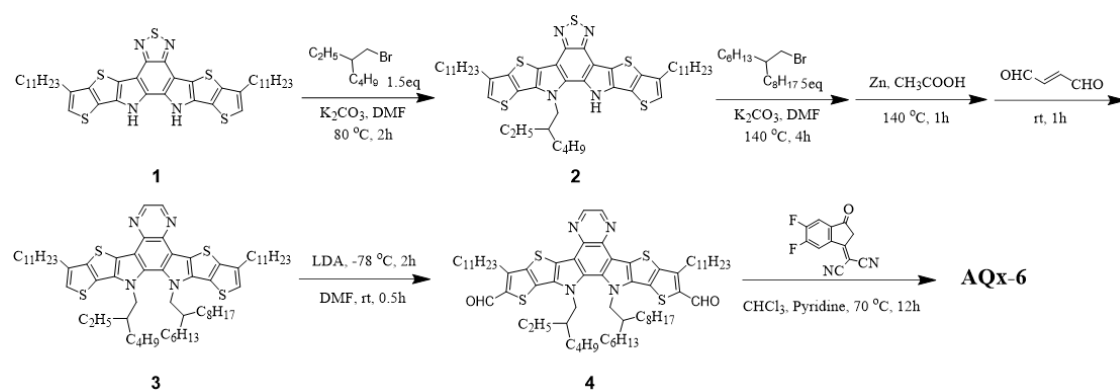

**Supplementary Figure 1.** The synthesis route of compound AQx-6.

► **Equilibrium MD: NPT ensemble**

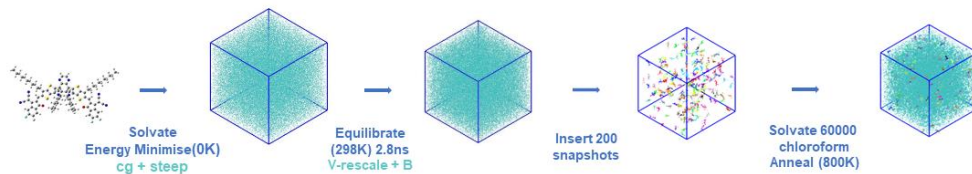

► **Quasi-equilibrium approach: Modelling of the solvent evaporation**

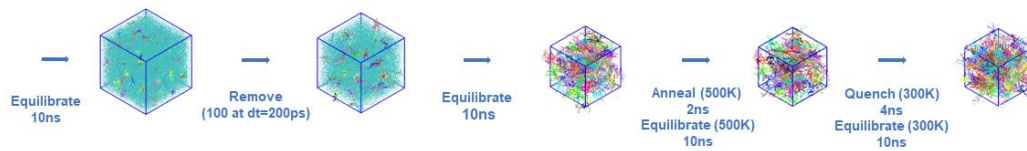

**Supplementary Figure 2.** The Molecular Dynamics Simulation approaches protocols with the simulated conditions specified and output visualized figure (produced by VMD) in each step.



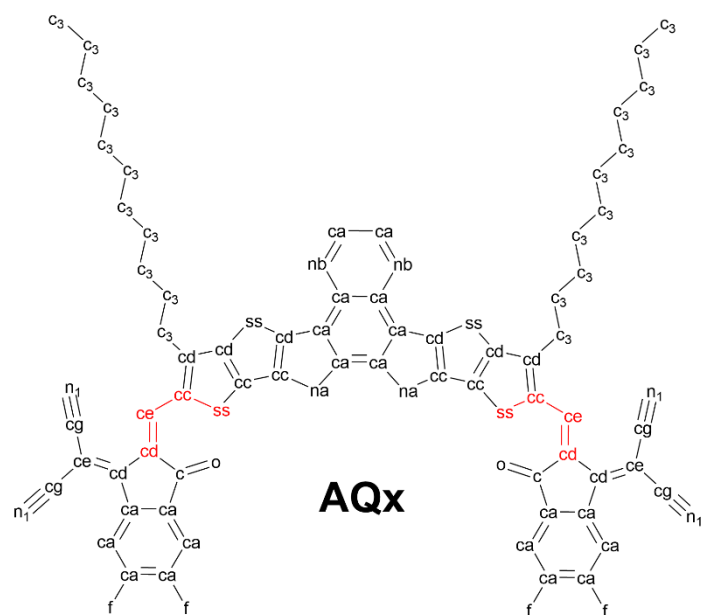

**Supplementary Figure 3.** Definition of atomic types for AQx from the general AMBER force field (GAFF). The missing torsion potential parameters are highlighted in red. The hydrogen atoms on cd and c3 atoms were defined as ha and hc respectively. The ha and hc hydrogen atoms and regulated alkyl chains were simplified in this figure.

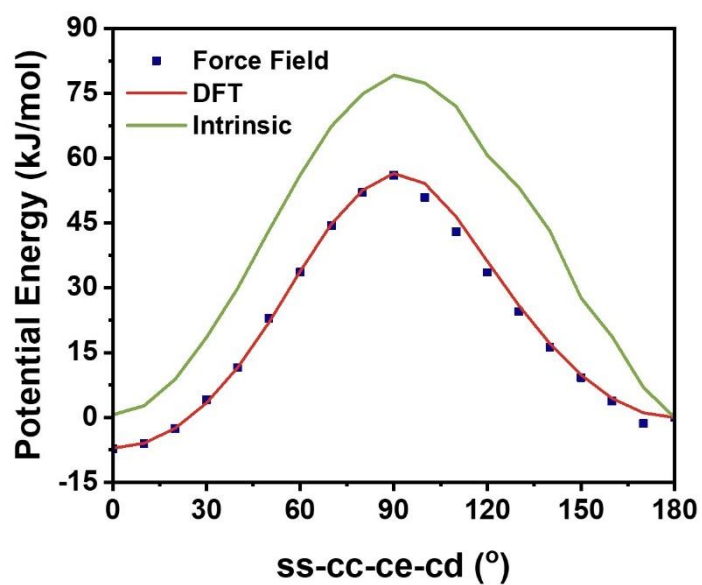

**Supplementary Figure 4.** AQx-2,-6,-8, were geometry optimized by Gaussian 16 codes under B3LYP-D3(BJ) functional, their two dihedral angles: ss-cc-ce-cd were both fitted using Ryckaert-Bellemans Function,  $V_{rb}(\phi_{ijkl}) = \sum_{n=0}^5 C_n(\cos(\psi))^n$  with the same parameters.

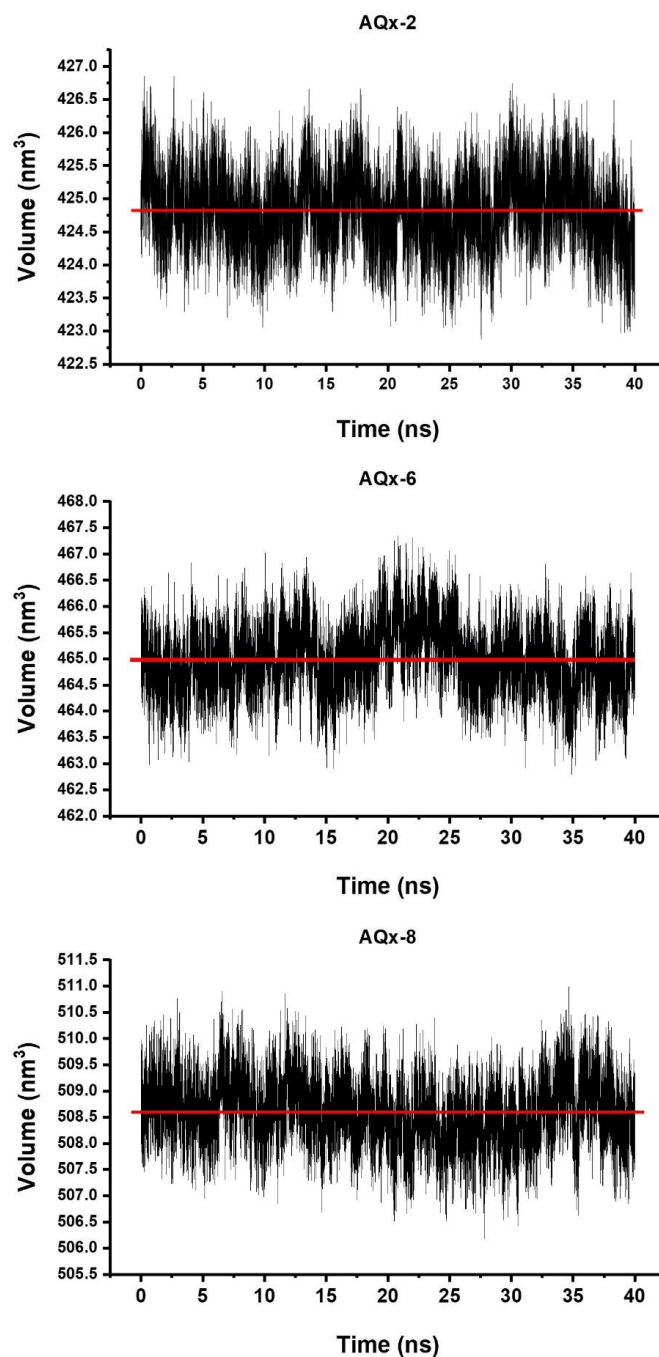

**Supplementary Figure 5.** The equilibrated 40ns of AQx-2, AQx-6 and AQx-8 after they became thin film (followed the protocol in **Figure S1**). Their volume fluctuations during the equilibrium and their average volume were presented: 424.83 +/- 0.52, 464.99 +/- 0.61, 508.59 +/- 0.60 nm<sup>3</sup>

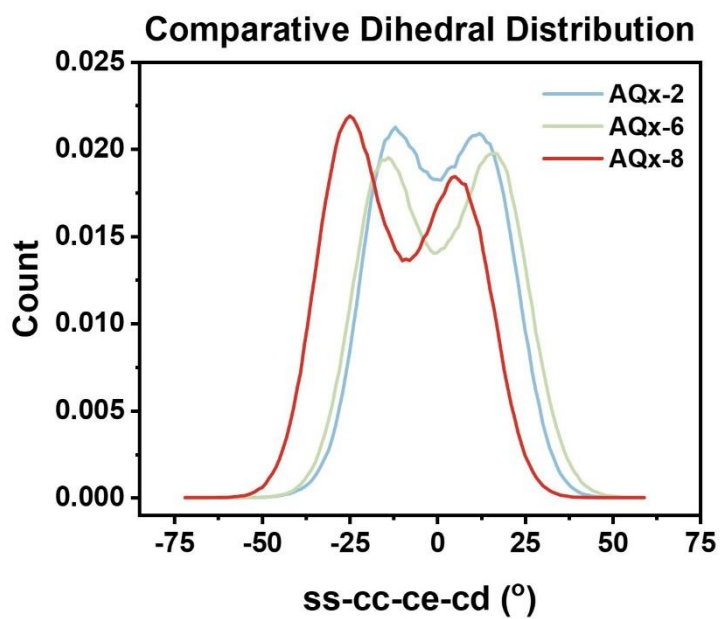

**Supplementary Figure 6.** Comparative Dihedral Distribution of two ss-cc-ce-cd for all 200 molecules in AQx-2, AQx-6, and AQx-8 thin films during the 40ns equilibrium, data was collected using GROMACS.

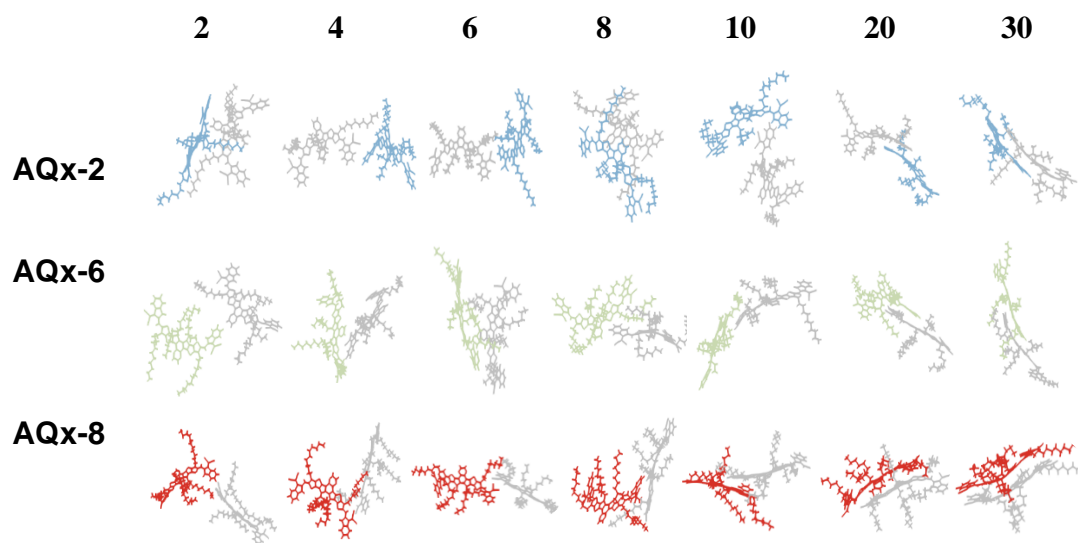

**Supplementary Figure 7.** The dimer conformations for molecules in AQx-2, AQx-6 and AQx-8 thin film were visualized using VMD as ascending amount of atoms on the molecular backbones contacted.

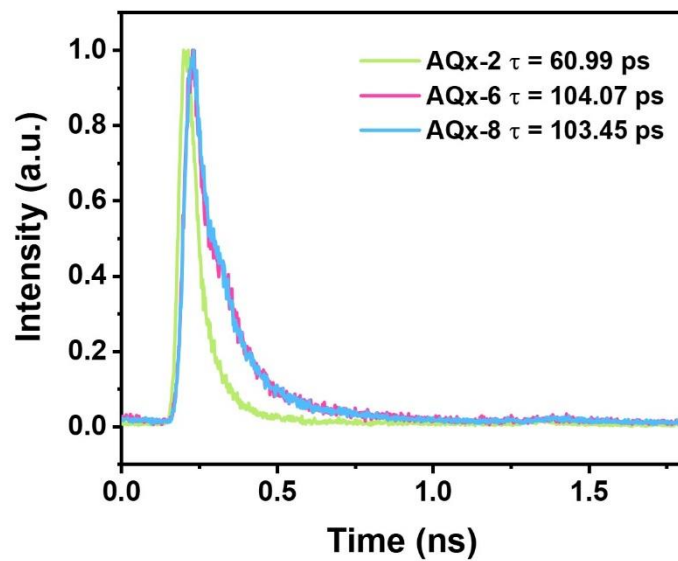

**Supplementary Figure 8.** The time-resolution photoluminescence (TRPL) spectrum of blend films under the probe of 900 nm (excited at 800 nm).

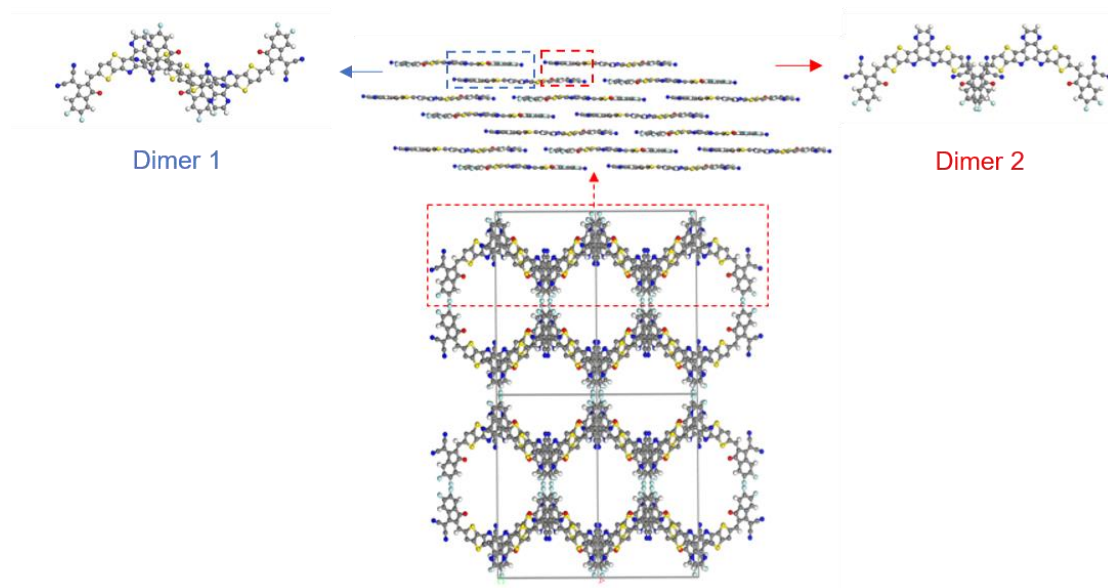

**Supplementary Figure 9.** The arrangement of the experimental AQx-2 single crystal.

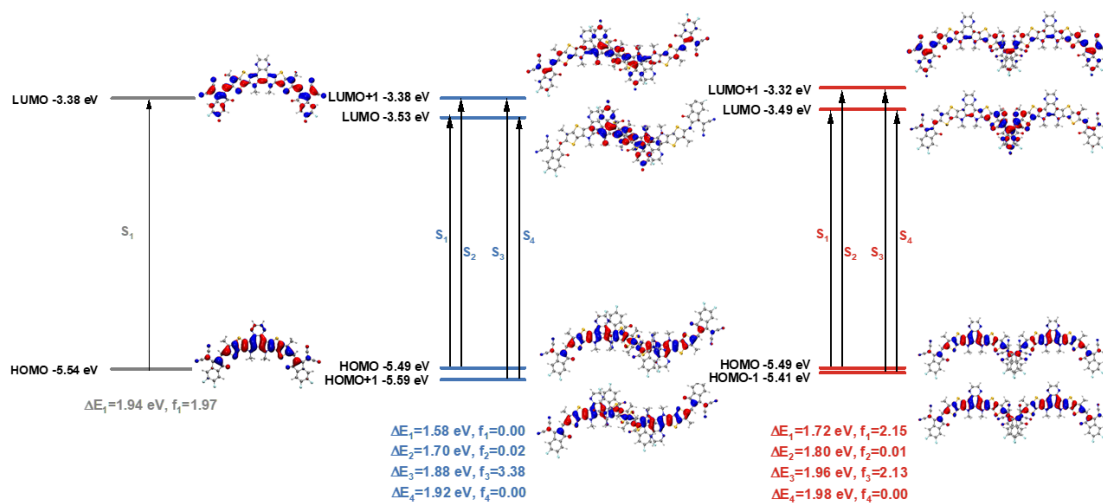

**Supplementary Figure 10.** The HOMO-LUMO orbital, transition dipole moments, and transition dipole moments of monomer (left), dimer 1 (middle), dimer 2 (right).



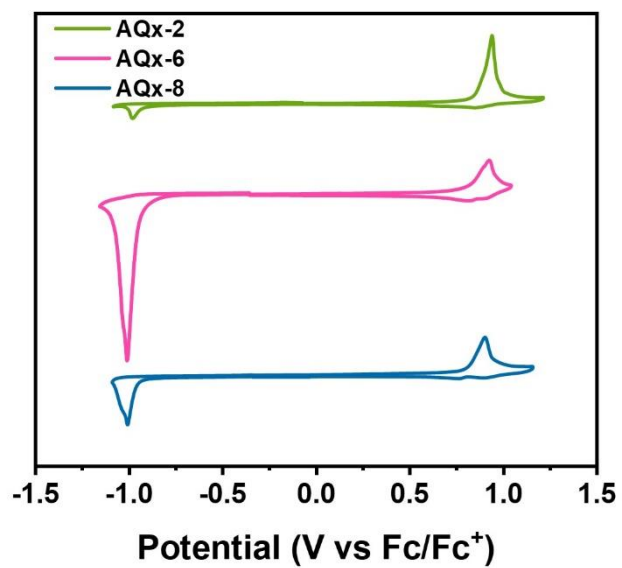

**Supplementary Figure 11.** Cyclic voltammogram of AQx-2, AQx-6 and AQx-8 film in diluted CH<sub>3</sub>CN solution with a scan rate of 100 mV s<sup>-1</sup>.

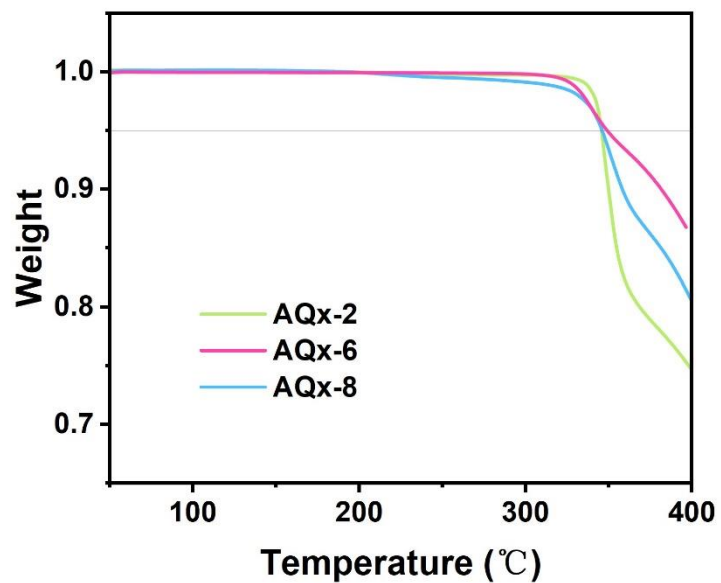

**Supplementary Figure 12.** The thermogravimetric analysis (TGA) AQx-2, AQx-6 and AQx-8.

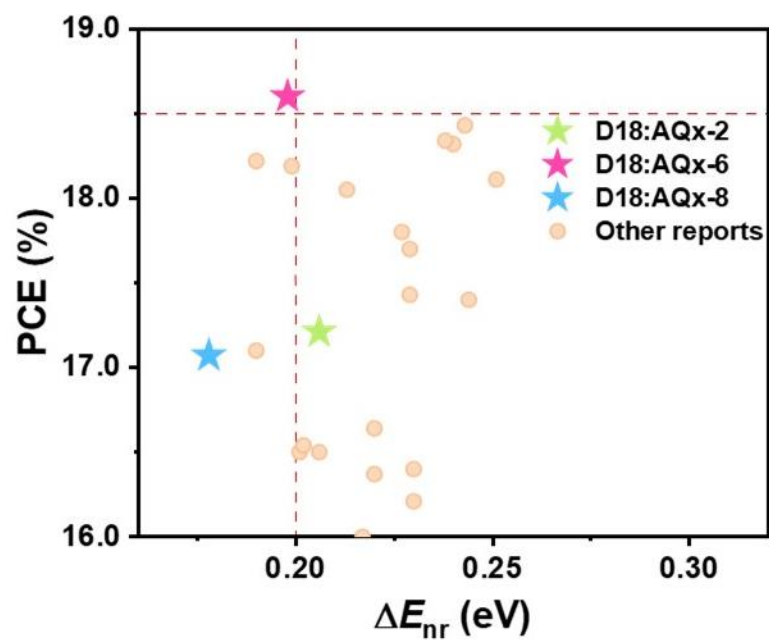

**Supplementary Figure 13.** Statistics on recent reported bulk-heterojunction binary OSCs.

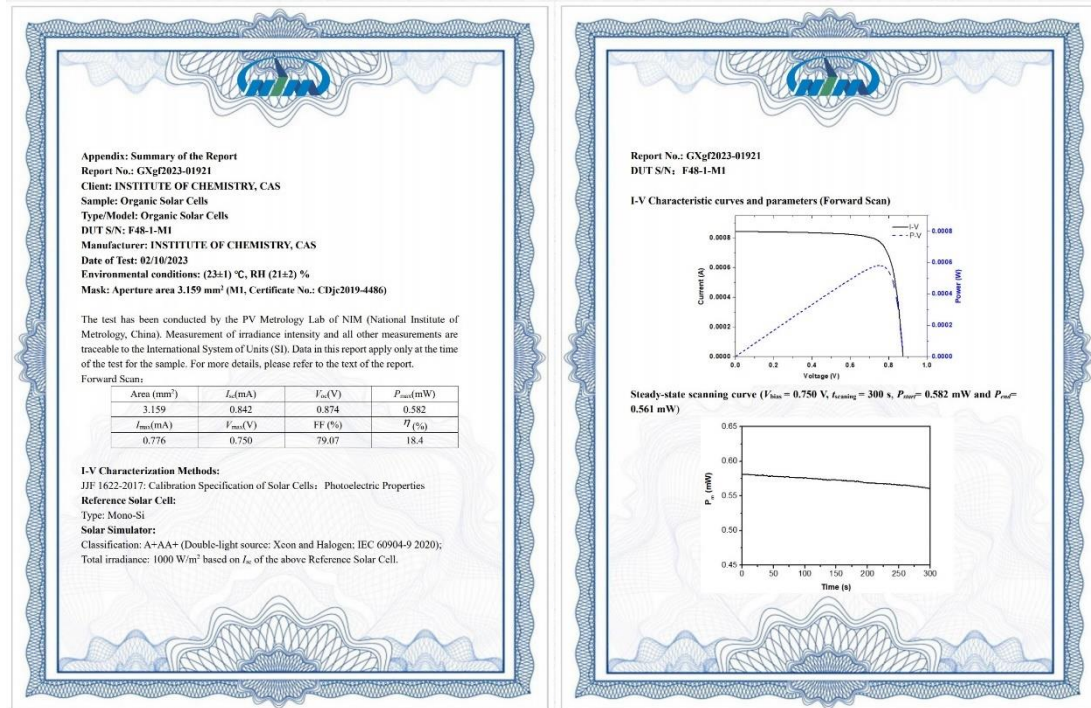

**Supplementary Figure 14.** The certified PCE for D18:AQx-6, obtained from National Institute of Metrology (NIM), China.

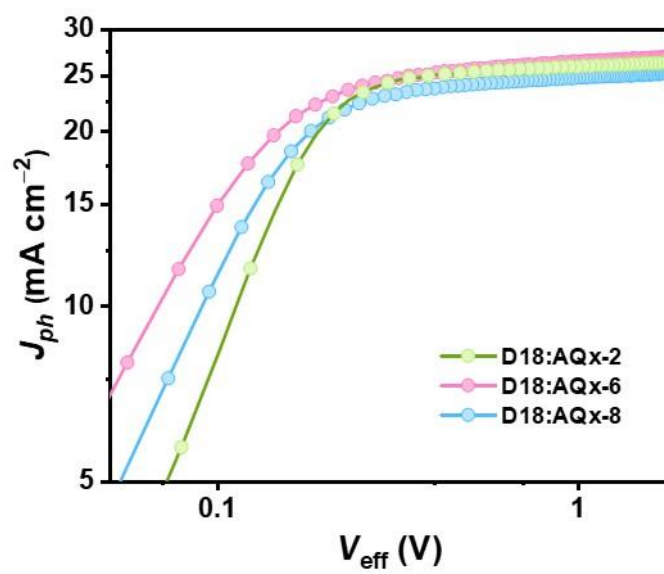

**Supplementary Figure 15.**  $J_{\text{ph}}$  versus  $V_{\text{eff}}$  curves for D18:AQx-2, D18:AQx-6 and D18:AQx-8 devices.

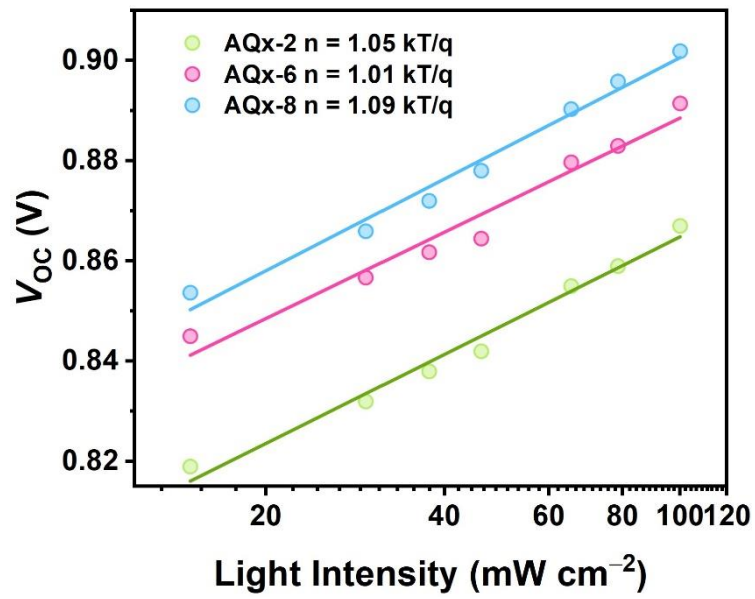

**Supplementary Figure 16.** The  $V_{OC}$  versus light intensity in AQx-2-, AQx-6- and AQx-8-based devices.

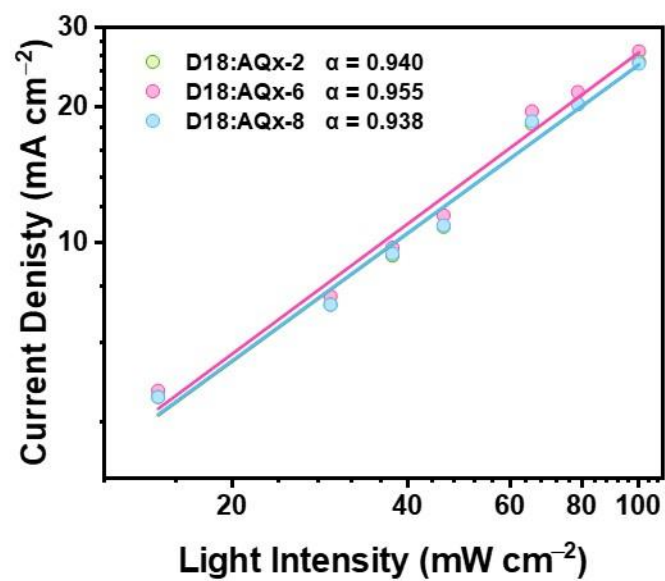

**Supplementary Figure 17.**  $J_{sc}$  dependence on light intensity for D18:AQx-2, D18:AQx-6 and D18:AQx-8 devices.

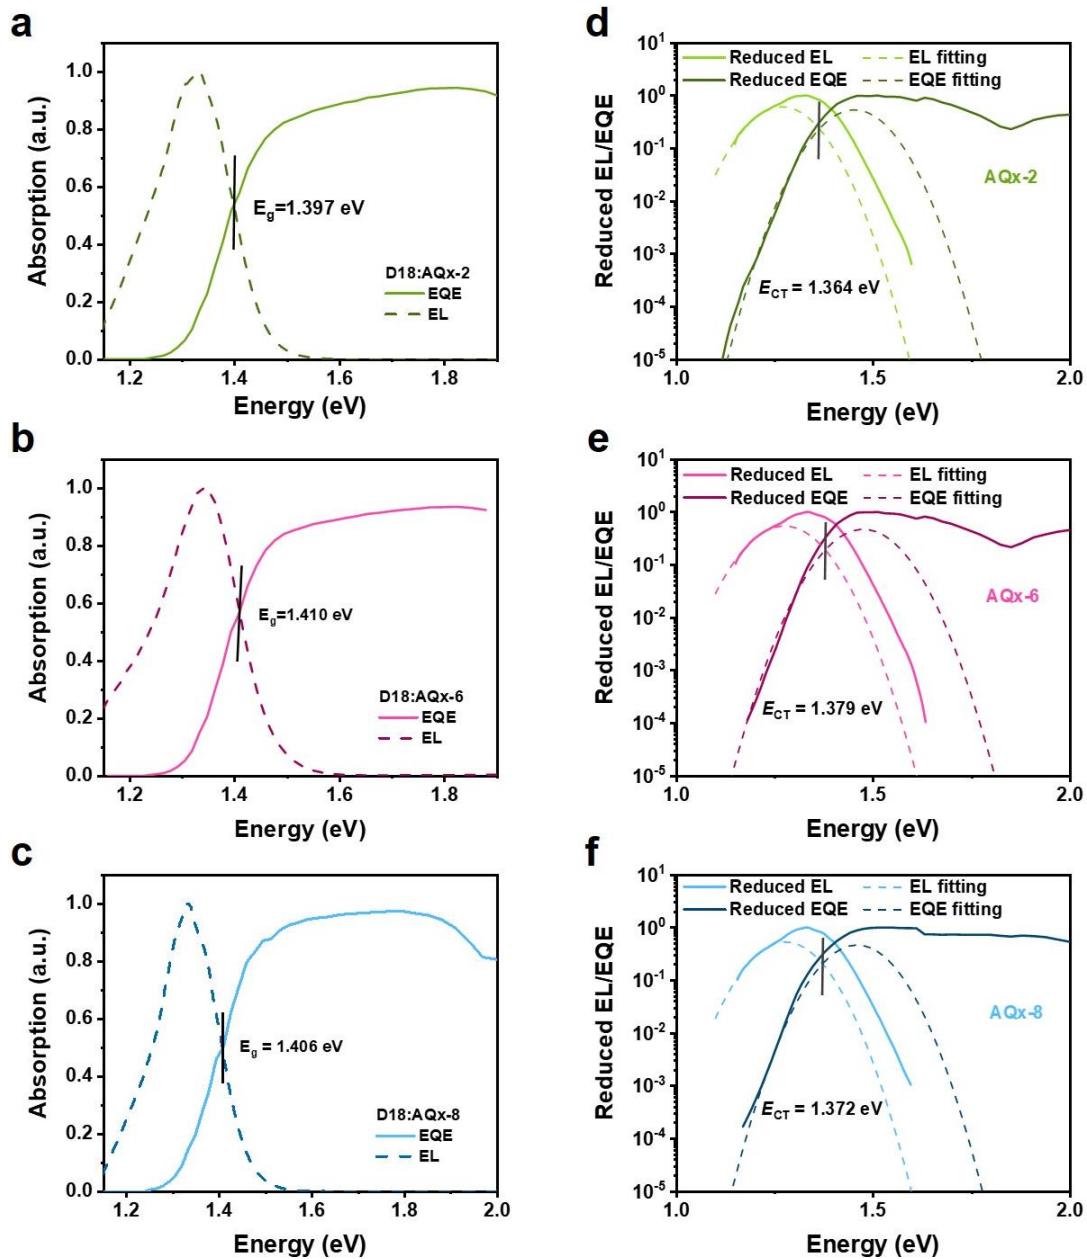

**Supplementary Figure 18.** a-c) The determination of the  $E_g$  of D18:AQx-2, D18:AQx-6 and D18:AQx-8 devices according to the crossing point between the normalized emission and external quantum efficiency spectra, d-f) The determination of the  $E_{CT}$  of D18:AQx-2, D18:AQx-6 and D18:AQx-8 devices via fitting reduced EL and sEQE.



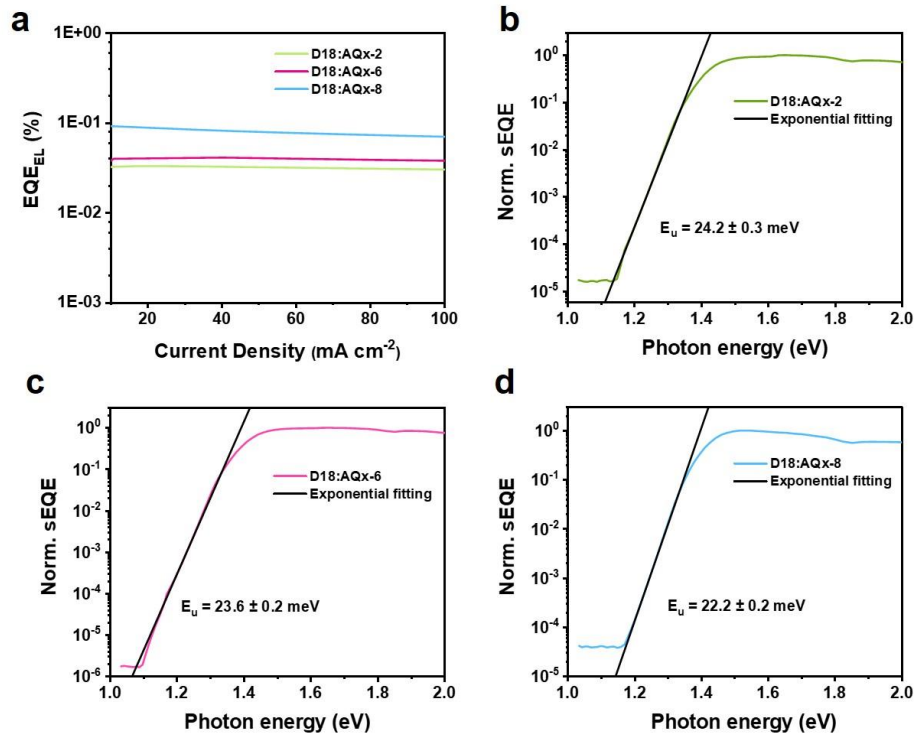

**Supplementary Figure 19.** a) The EQE<sub>EL</sub> for D18:AQx-2, D18:AQx-6 and D18:AQx-8 devices, b-d) the highly sensitive EQE spectra of D18:AQx-2, D18:AQx-6 and D18:AQx-8 devices. The Urbach energy ( $E_u$ ) was fitted by the equation of  $E_u = \alpha_0 e^{\frac{E-E_g}{E_u}}$ , where  $\alpha_0$  is the optical absorption coefficient at the band edge,  $E$  is the photon energy.

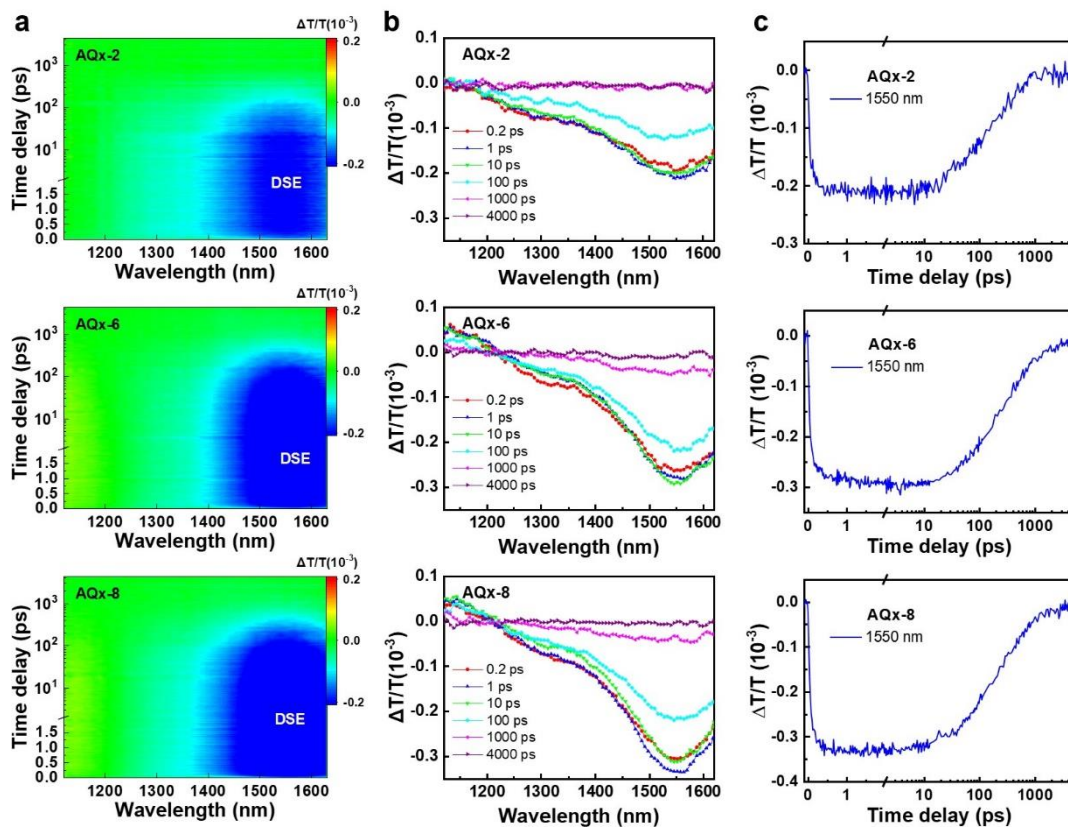

**Supplementary Figure 20.** a-c, TA profiles (a), TA spectra at different time delay (b) and TA traces of delocalized singlet exciton (DSE) signals probed at 1550 nm (c) for AQx-2, AQx-6 and AQx-8 neat films with pump at 800 nm.

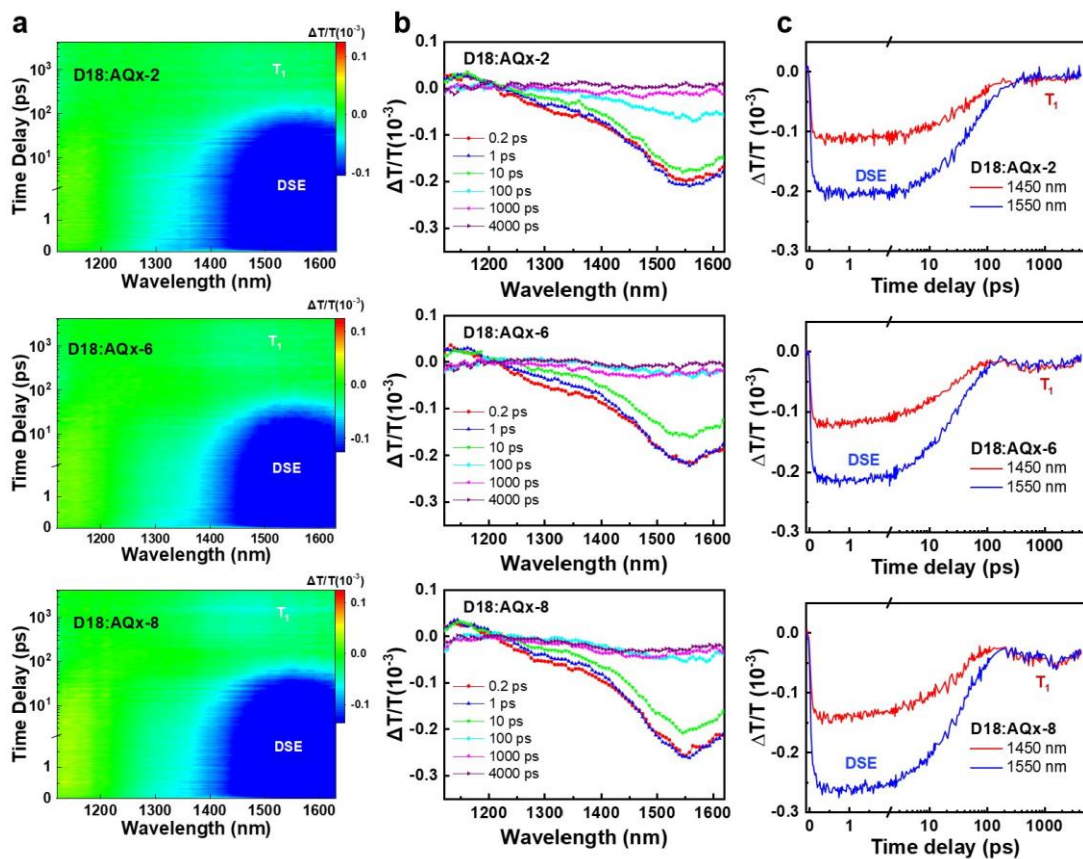

**Supplementary Figure 21.** a-c, TA profiles (a), TA spectra at different time delay (b) and TA traces of  $T_1$  signals probed at 1450 nm and DSE signals probed at 1550 nm (c) for D18:AQx-2, D18:AQx-6 and D18:AQx-8 blend films with pump at 800 nm.

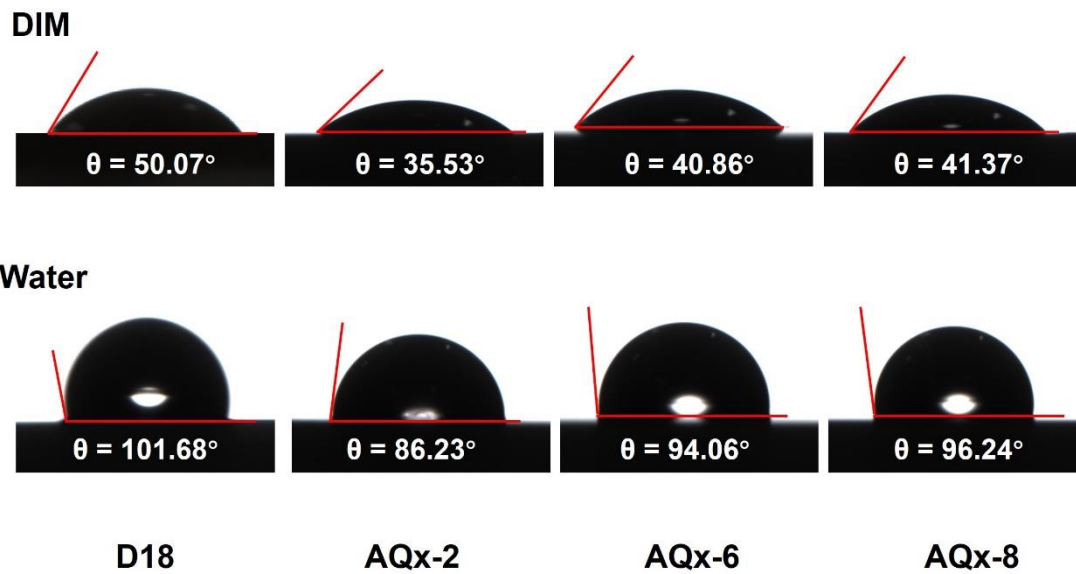

**Supplementary Figure 22.** The contact angle for D18, AQx-2, AQx-6 and AQx-8. DIM is diiodomethane and water is deionized.

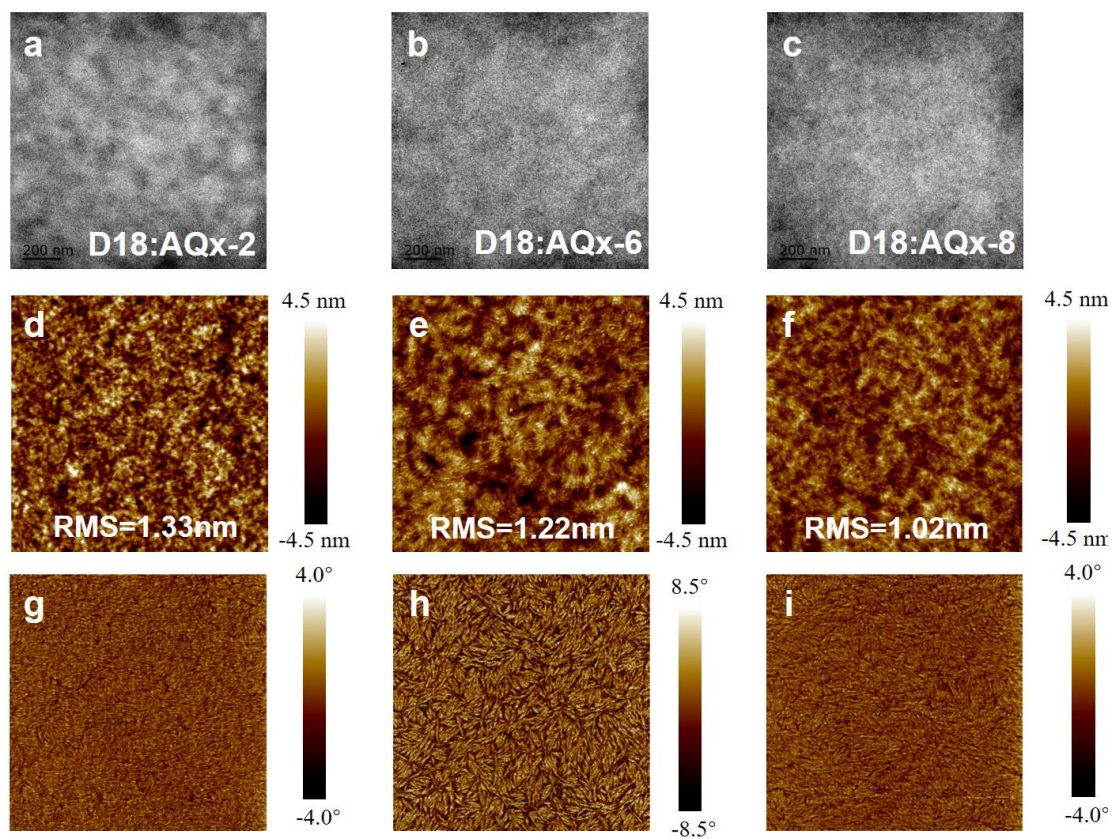

**Supplementary Figure 23.** a-c) TEM images (200 nm), d-f) AFM height and g-i) phase images of D18:AQx-2, D18:AQx-6 and D18:AQx-8 films ( $3\mu\text{m} \times 3\mu\text{m}$ ).

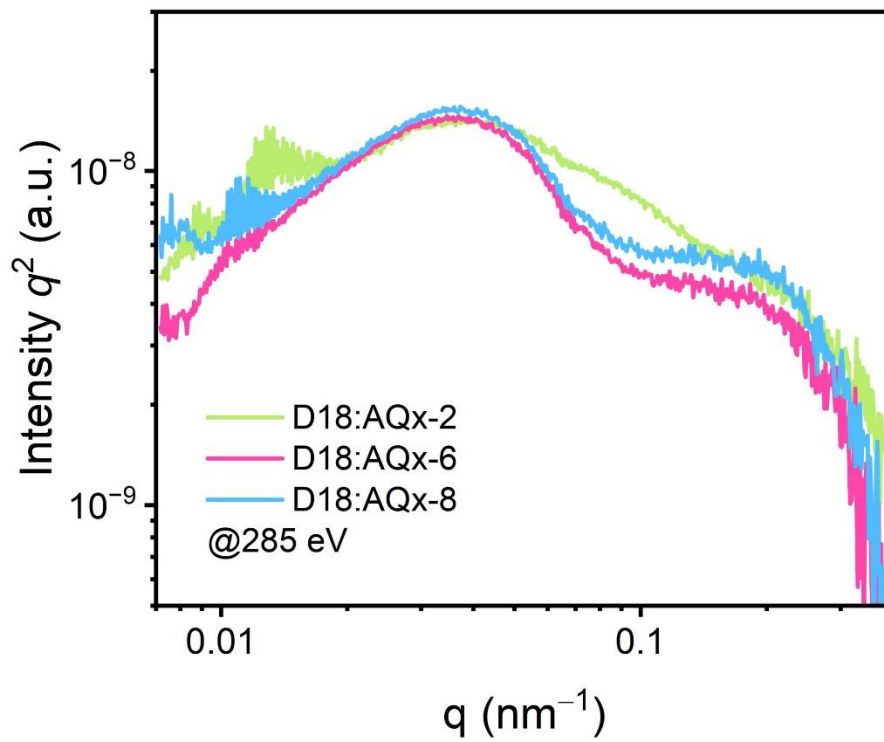

**Supplementary Figure 24.** RSoXS profiles of D18:AQx-2, D18:AQx-6 and D18:AQx-8 blend films.

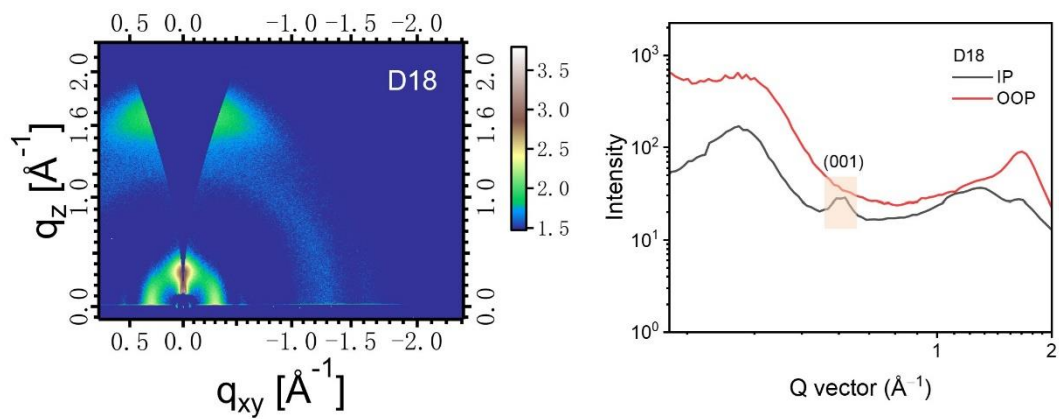

**Supplementary Figure 25.** GIWAXS 2D patterns and the corresponding line-cuts of GIWAXS patterns for D18 neat film.

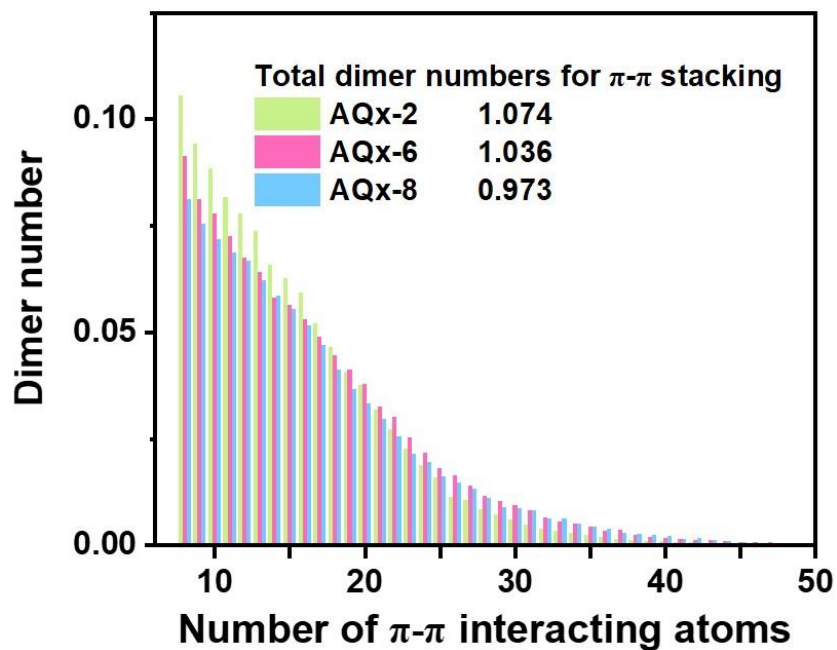

**Supplementary Figure 26.** The average number of dimers per molecule as a function of the number of backbone interacting atoms for the MD simulated AQx-2, AQx-6 and AQx-8 thin films. The dimers with  $\geq 8$  interacting atoms can be regarded as  $\pi$ - $\pi$  stacking.



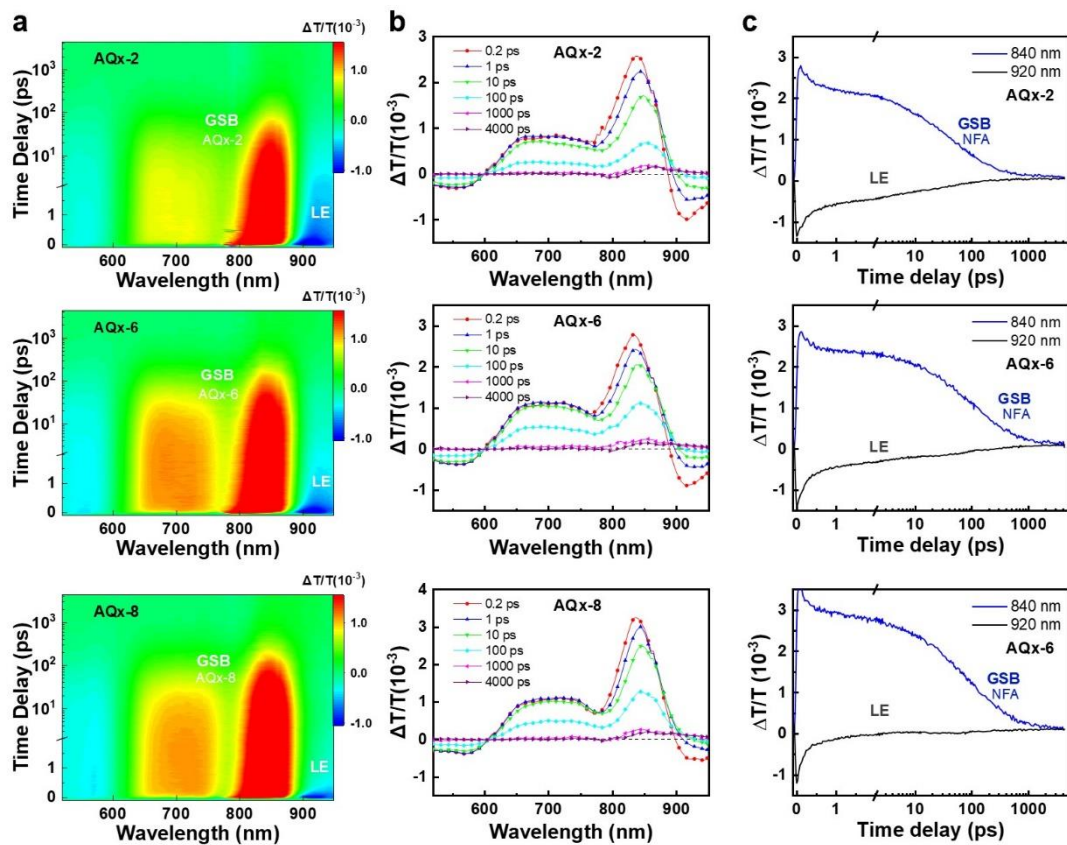

**Supplementary Figure 27.** a-c, TA profiles (a), TA spectra at different time delay (b) and TA traces of ground-states bleaching (GSB) signals probed at 840 nm and ESA signals of local excited (LE) state probed at 920 nm (c) for AQx-2, AQx-6 and AQx-8 neat films with pump at 800 nm.

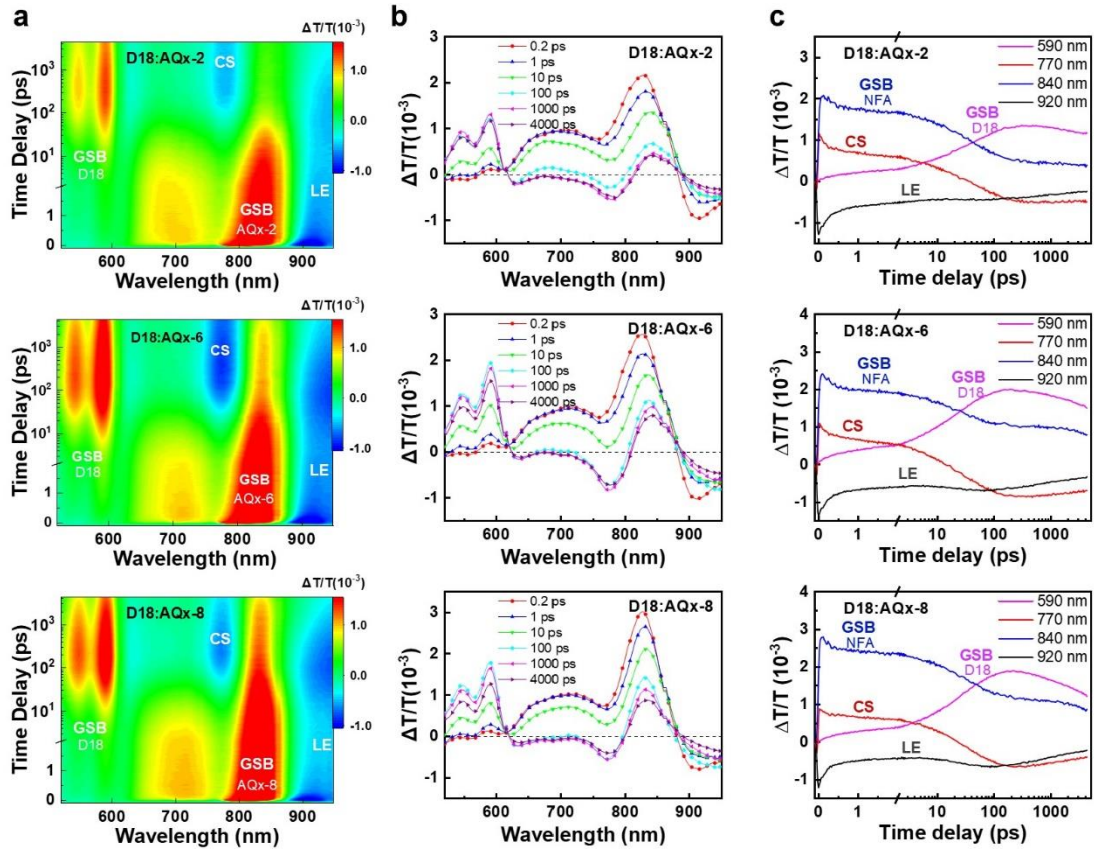

**Supplementary Figure 28.** a-c, TA profiles (a), TA spectra at different time delay (b) and TA traces of GSB signal for D18: 590nm, the CS signal for D18:AQx-6 blend: 770 nm, the GSB (840 nm) and LE signals (920 nm) of AQx-type acceptor (c) for AQx-2, AQx-6 and: AQx-8 neat films with pump at 800 nm.

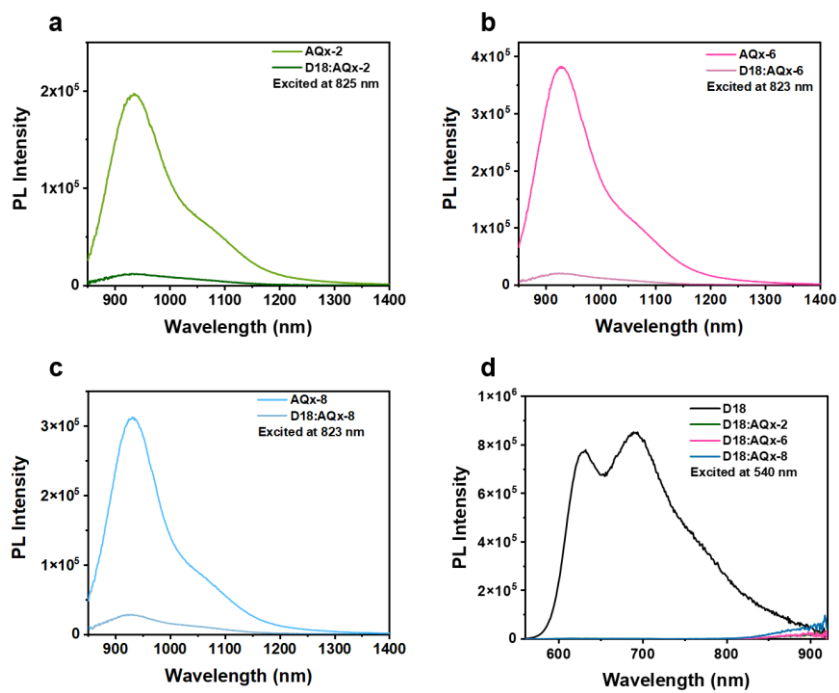

**Supplementary Figure 29.** Photoluminescence spectra for a-c) the AQx-type neat films and the corresponding blend films and d) the D18 film and the relevant blend films.

## Compound 2.

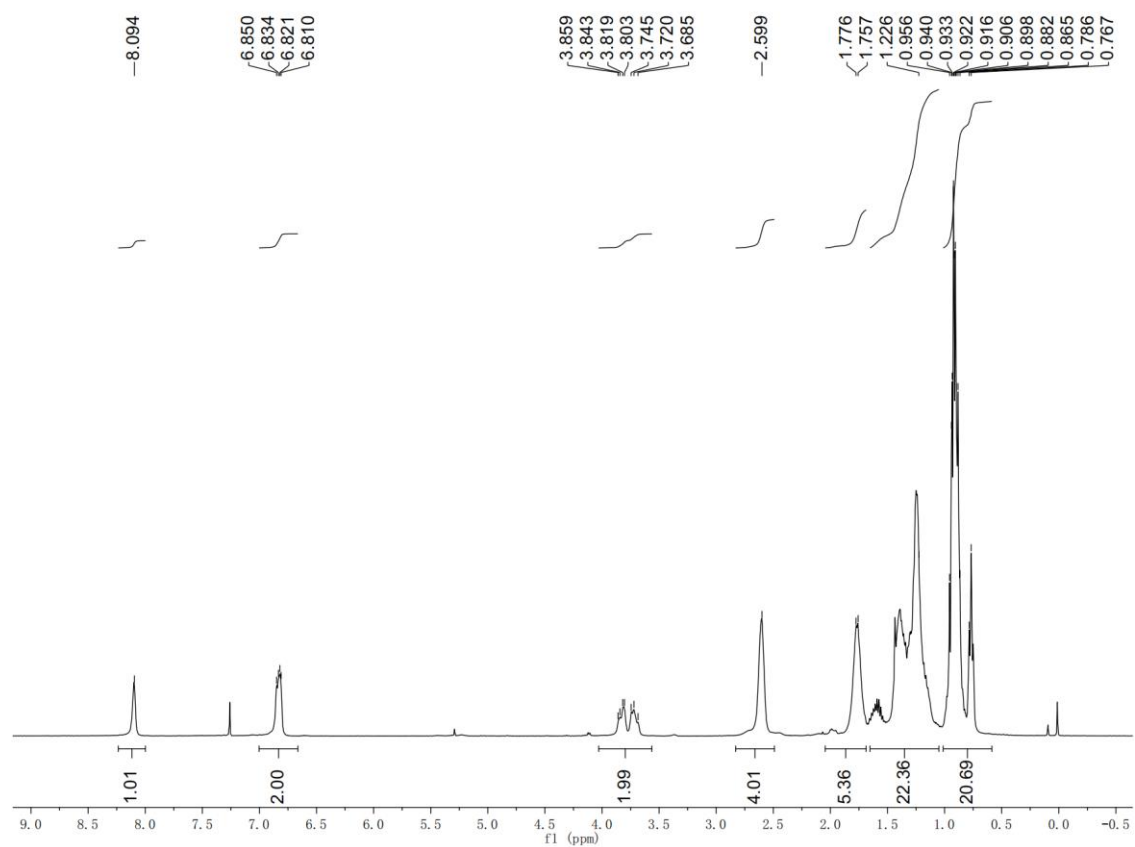

Supplementary Figure 30. The <sup>1</sup>H NMR spectrum for compound 2.

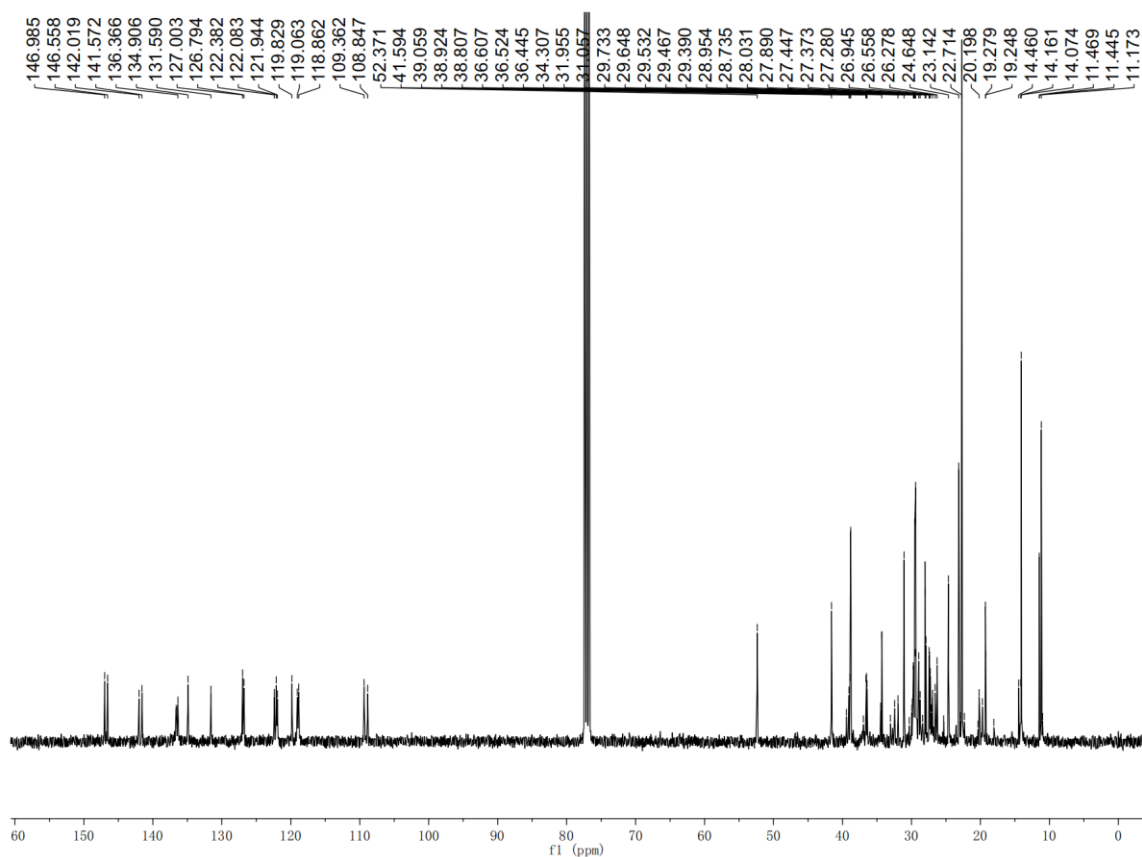

Supplementary Figure 31. The <sup>13</sup>C NMR spectrum for compound 2.

### Compound 3.

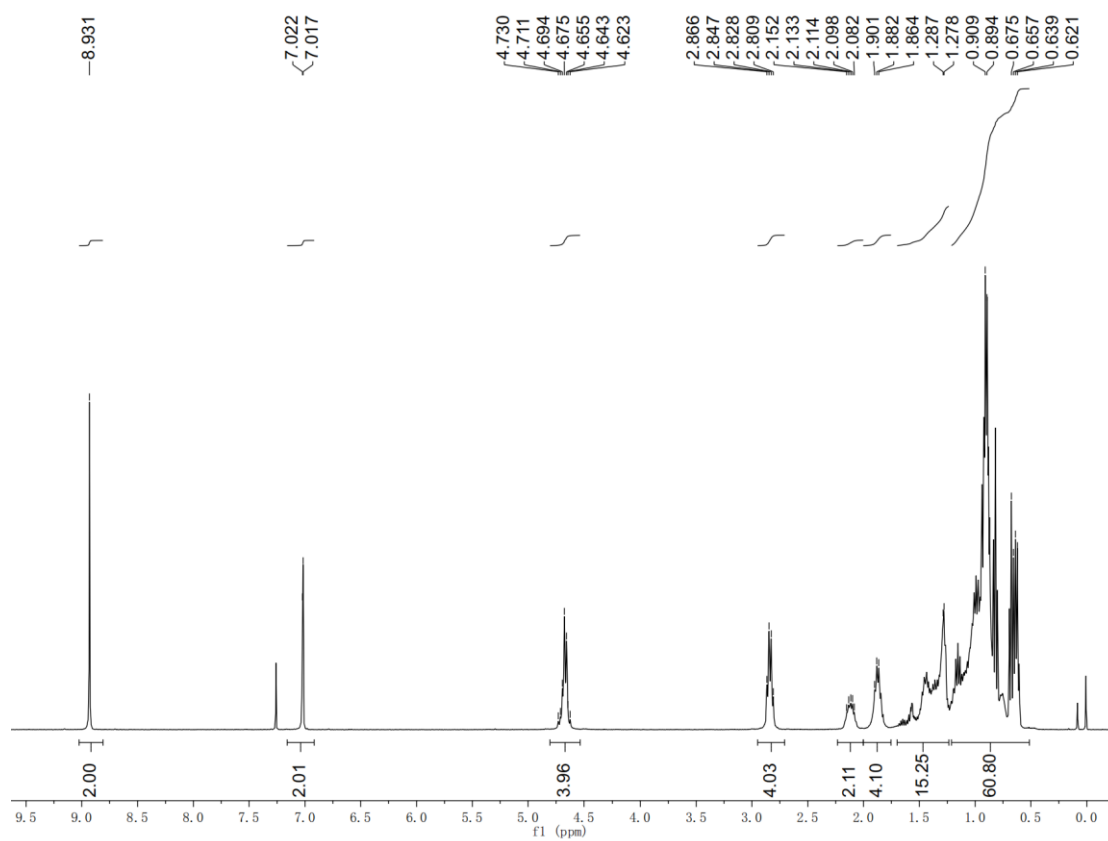

Supplementary Figure 32. The <sup>1</sup>H NMR spectrum for compound 3.

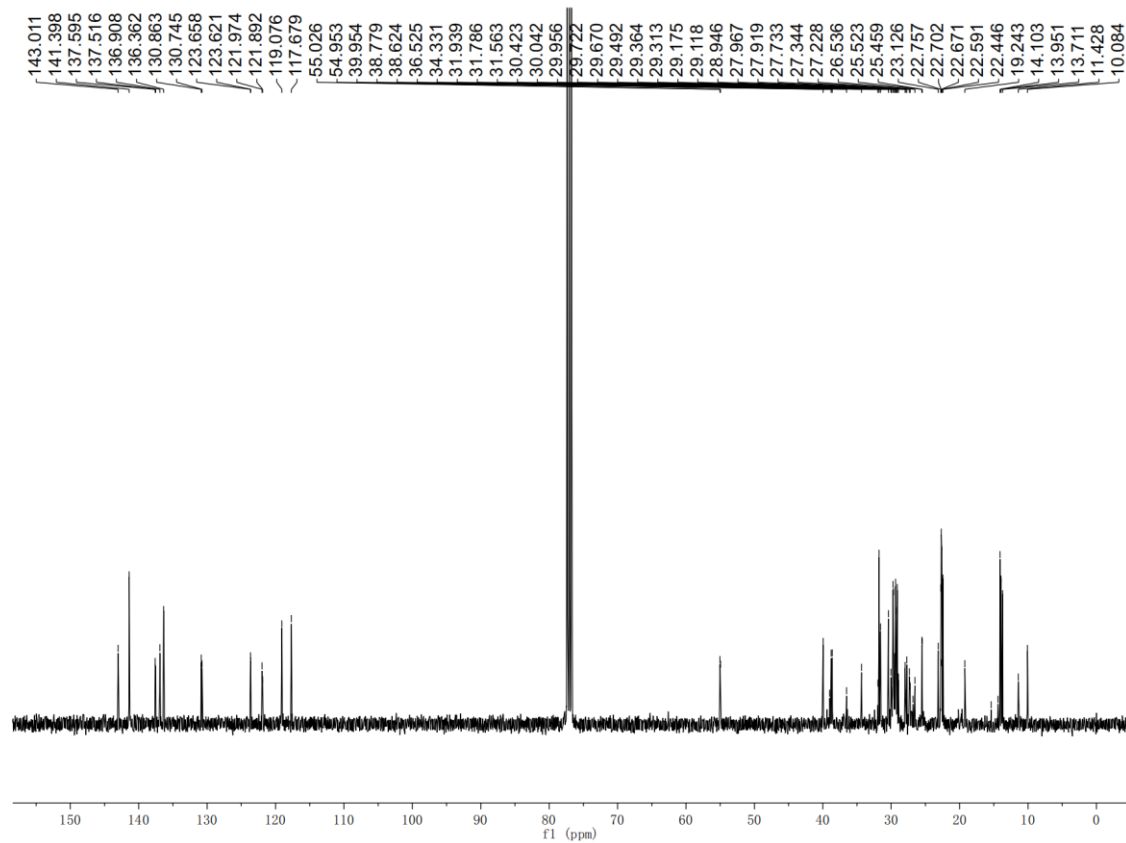

Supplementary Figure 33. The  $^{13}\text{C}$  NMR spectrum for compound 3.

**Compound 4.**

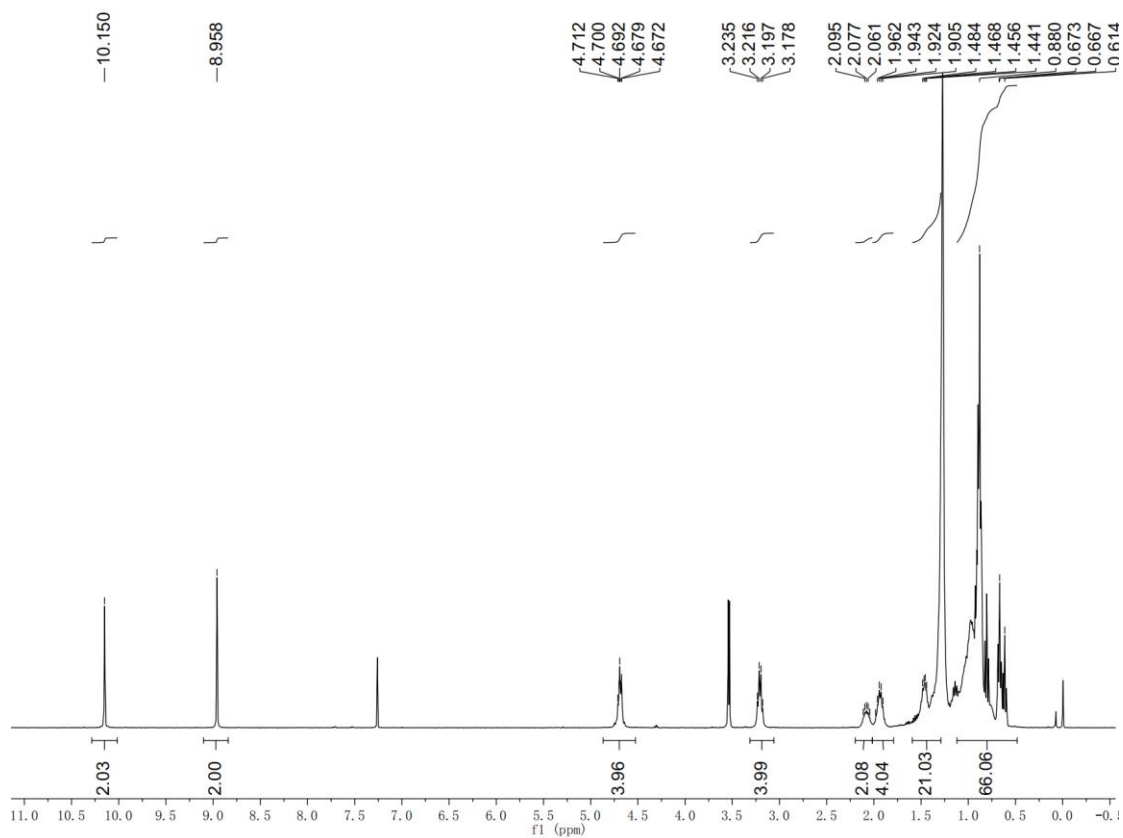

**Supplementary Figure 34.** The  $^1\text{H}$  NMR spectrum for compound 4.



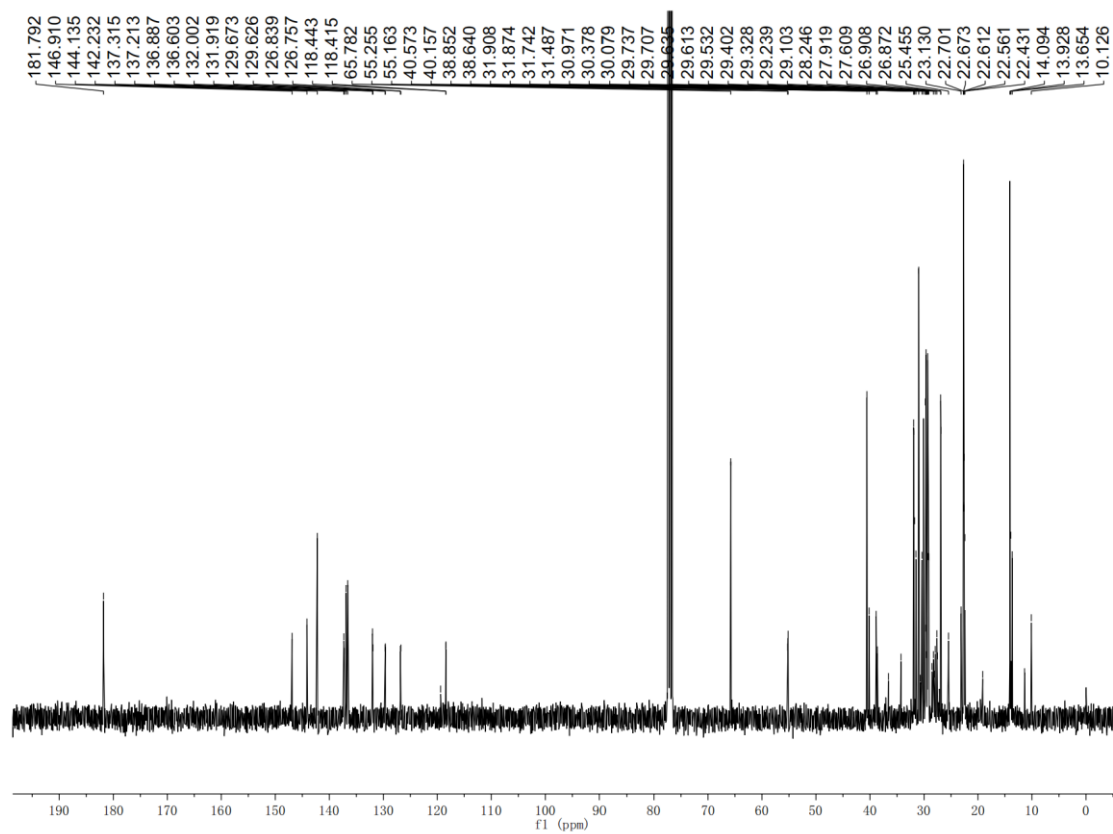

Supplementary Figure 35. The  $^{13}\text{C}$  NMR spectrum for compound 4.

### Compound AQX-6.

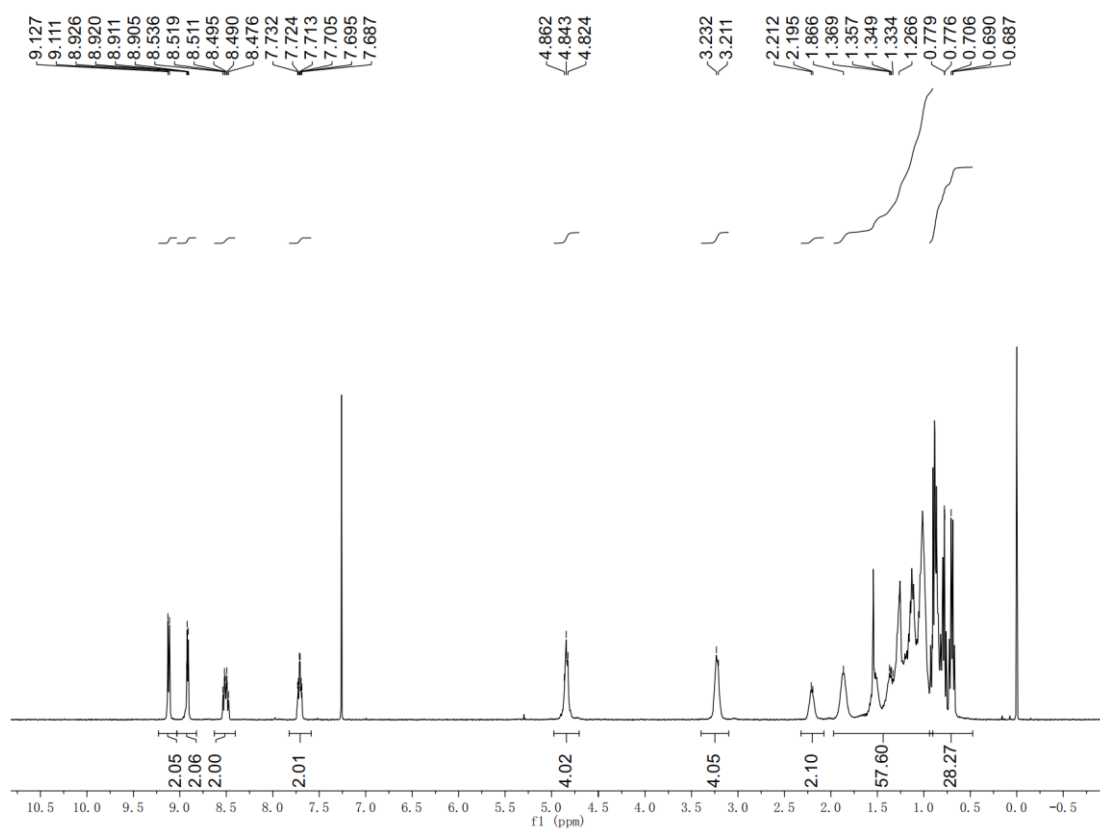

Supplementary Figure 36. The  $^1\text{H}$  NMR spectrum for AQx-6.

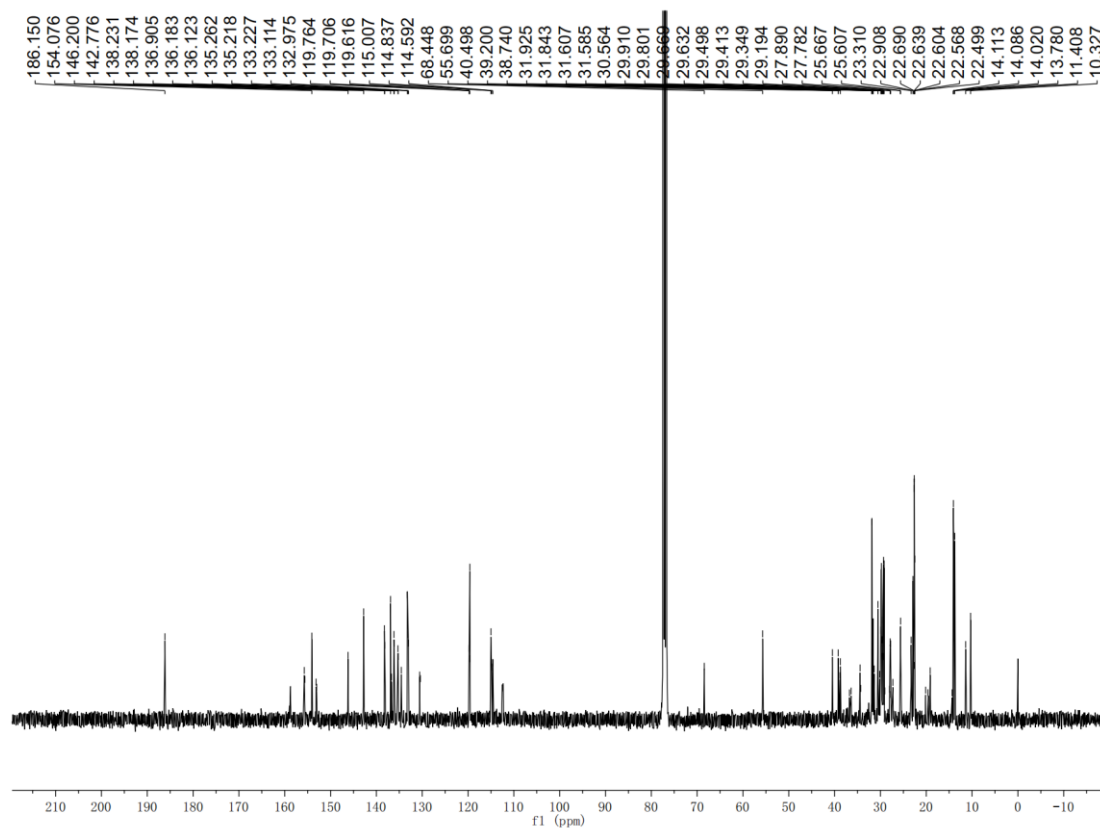

**Supplementary Figure 37.** The  $^{13}\text{C}$  NMR spectrum for AQx-6.

### Compound AQX-8.

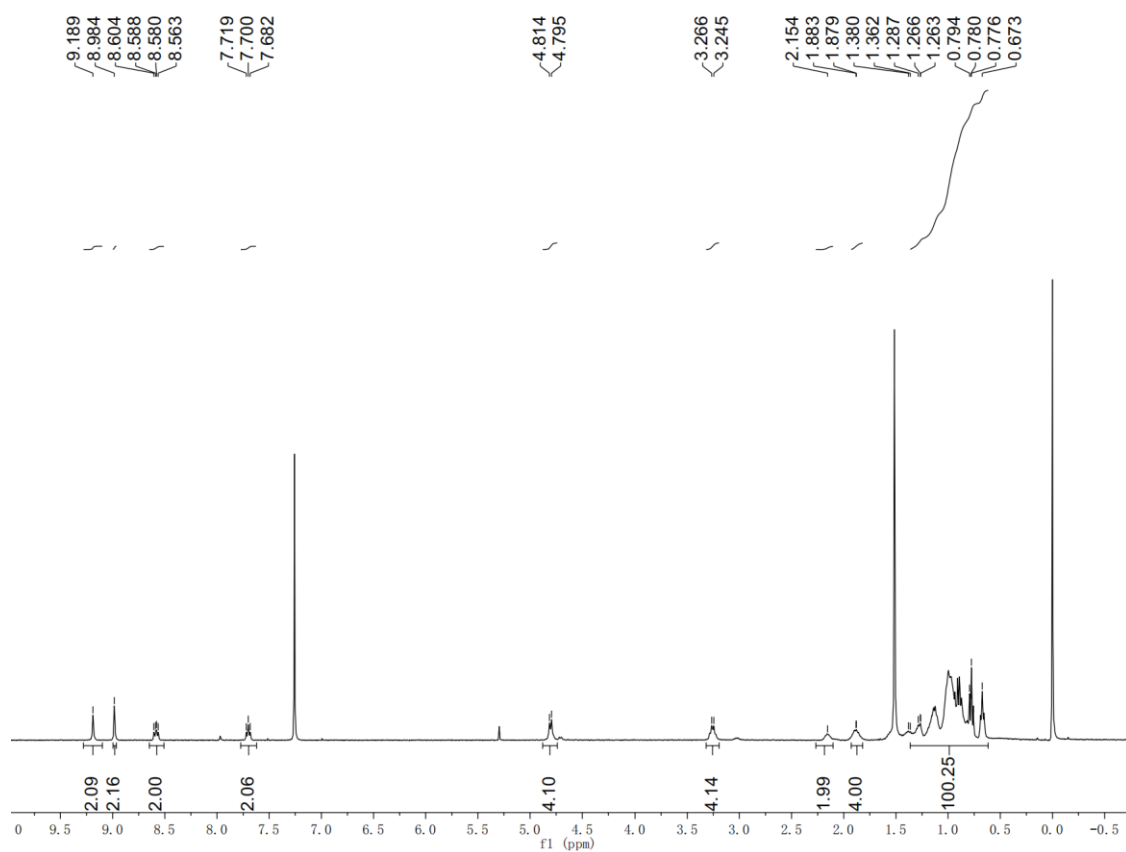

Supplementary Figure 38. The  $^1\text{H}$  NMR spectrum for AQx-8.

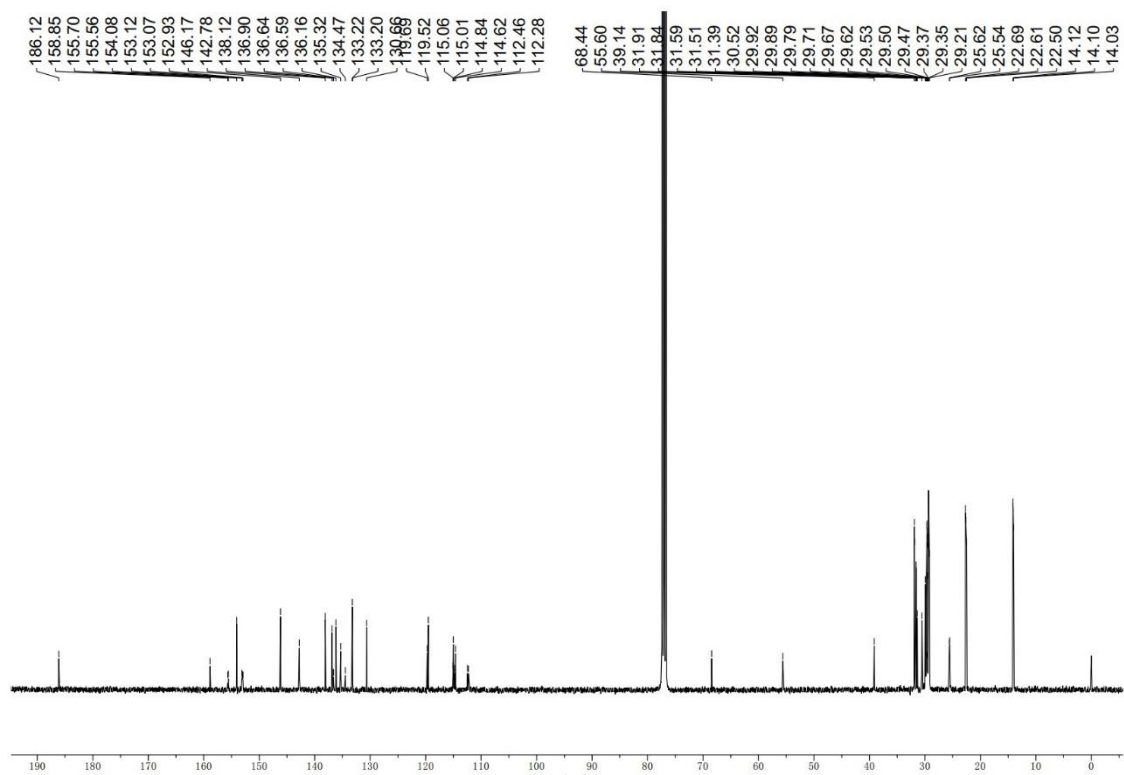

Supplementary Figure 39. The  $^{13}\text{C}$  NMR spectrum for AQx-8.

### 3. Supplementary Tables

**Supplementary Table 1.** The PLQY, carrier lifetime ( $\tau$ ), radiative and nonradiative decay rate ( $k_r$  and  $k_{nr}$ ) and molecular overlap for AQx-2, AQx-6, AQx-8.

| Film  | PLQY (%) | $\tau$ (ps) | $k_r$ (s <sup>-1</sup> ) | $k_{nr}$ (s <sup>-1</sup> ) | Molecular overlap |
|-------|----------|-------------|--------------------------|-----------------------------|-------------------|
| AQx-2 | 0.39     | 60.99       | $6.40 \times 10^7$       | $1.63 \times 10^{10}$       | 0.874             |
| AQx-6 | 0.64     | 104.07      | $6.44 \times 10^7$       | $9.55 \times 10^9$          | 0.863             |
| AQx-8 | 1.54     | 103.45      | $1.49 \times 10^8$       | $9.52 \times 10^9$          | 0.813             |

**Supplementary Table 2.** Photovoltaic parameters of OSCs based on D18:AQx-6 treated with different thermal annealing.

| Treatment | $V_{oc}$<br>[V] | $J_{sc}$<br>[mA/cm <sup>2</sup> ] | FF<br>[%] | PCE<br>[%] |
|-----------|-----------------|-----------------------------------|-----------|------------|
| As cast   | 0.896           | 25.1                              | 74.9      | 16.8       |
| 60°C      | 0.891           | 25.8                              | 77.1      | 17.7       |
| 80°C      | 0.891           | 26.8                              | 77.8      | 18.6       |
| 100°C     | 0.890           | 26.1                              | 75.2      | 17.4       |
| 120°C     | 0.884           | 26.5                              | 74.7      | 17.6       |

**Supplementary Table 3.** Photovoltaic parameters of OSCs based on D18:AQx-6 with different D/A ratio at 80°C thermal annealing.

| D:A   | $V_{oc}$<br>[V] | $J_{sc}$<br>[mA/cm <sup>2</sup> ] | FF<br>[%] | PCE<br>[%] |
|-------|-----------------|-----------------------------------|-----------|------------|
| 1:1   | 0.891           | 25.4                              | 76.2      | 17.3       |
| 1:1.2 | 0.892           | 26.8                              | 77.8      | 18.6       |
| 1:1.4 | 0.891           | 25.3                              | 73.9      | 16.7       |



**Supplementary Table 4.** Photovoltaic parameters of OSCs based on D18:AQx-2 treated with different thermal annealing.

| Treatment | $V_{oc}$<br>[V] | $J_{sc}$<br>[mA/cm <sup>2</sup> ] | FF<br>[%] | PCE<br>[%] |
|-----------|-----------------|-----------------------------------|-----------|------------|
| As cast   | 0.873           | 24.5                              | 75.3      | 16.1       |
| 60°C      | 0.871           | 25.4                              | 75.3      | 16.7       |
| 80°C      | 0.868           | 26.1                              | 76.0      | 17.2       |
| 100°C     | 0.865           | 25.9                              | 75.6      | 16.9       |
| 120°C     | 0.860           | 25.8                              | 75.5      | 16.8       |

**Supplementary Table 5.** Photovoltaic parameters of OSCs based on D18:AQx-2 with different D/A ratio at 80°C thermal annealing.

| D:A   | $V_{oc}$<br>[V] | $J_{sc}$<br>[mA/cm <sup>2</sup> ] | FF<br>[%] | PCE<br>[%] |
|-------|-----------------|-----------------------------------|-----------|------------|
| 1:1   | 0.870           | 25.3                              | 76.3      | 16.8       |
| 1:1.2 | 0.868           | 26.1                              | 76.0      | 17.2       |
| 1:1.4 | 0.868           | 25.9                              | 75.3      | 16.9       |

**Supplementary Table 6.** Photovoltaic parameters of OSCs based on D18:AQx-8 treated with different thermal annealing.

| Treatment | $V_{oc}$<br>[V] | $J_{sc}$<br>[mA/cm <sup>2</sup> ] | FF<br>[%] | PCE<br>[%] |
|-----------|-----------------|-----------------------------------|-----------|------------|
| As cast   | 0.914           | 24.3                              | 75.0      | 16.7       |
| 60°C      | 0.914           | 24.9                              | 74.4      | 17.0       |
| 80°C      | 0.913           | 24.7                              | 75.7      | 17.1       |
| 100°C     | 0.909           | 24.8                              | 74.8      | 16.9       |
| 120°C     | 0.902           | 24.9                              | 74.0      | 16.6       |

**Supplementary Table 7.** Photovoltaic parameters of OSCs based on D18:AQx-8 with different D/A ratio at 80°C thermal annealing.

| D:A   | $V_{oc}$<br>[V] | $J_{sc}$<br>[mA/cm <sup>2</sup> ] | FF<br>[%] | PCE<br>[%] |
|-------|-----------------|-----------------------------------|-----------|------------|
| 1:1   | 0.914           | 24.7                              | 74.4      | 16.8       |
| 1:1.2 | 0.913           | 24.7                              | 75.7      | 17.1       |
| 1:1.4 | 0.909           | 24.9                              | 74.5      | 16.8       |

**Supplementary Table 8.** The  $E_{\text{loss}}$  of D18:AQx-2, D18:AQx-6 and D18:AQx-8 based OSCs.

| Active layer | $E_g$<br>[eV] | $\Delta E_{\text{loss}}$<br>[eV] | $\Delta E_1$<br>[eV] | $\text{EQE}_{\text{EL}}$ | $\Delta E_{\text{nr}}$<br>[eV] | $\Delta E_r$<br>[eV] |
|--------------|---------------|----------------------------------|----------------------|--------------------------|--------------------------------|----------------------|
| D18:AQx-2    | 1.397         | 0.529                            | 0.265                | $3.29 \times 10^{-4}$    | 0.206                          | 0.059                |
| D18:AQx-6    | 1.410         | 0.518                            | 0.266                | $4.05 \times 10^{-4}$    | 0.198                          | 0.055                |
| D18:AQx-8    | 1.406         | 0.493                            | 0.266                | $8.65 \times 10^{-4}$    | 0.178                          | 0.049                |

**Supplementary Table 9.** Surface energy of the D18, AQx-2, AQx-6 and AQx-8 pristine films.

| Materials | $\theta_{\text{DIM}}$<br>[ deg ] | $\theta_{\text{water}}$<br>[ deg ] | $\gamma$<br>[mN m <sup>-1</sup> ] | $\gamma^{\text{p}}$<br>[mN m <sup>-1</sup> ] | $\gamma^{\text{d}}$<br>[mN m <sup>-1</sup> ] | $\chi^{\text{D-A}}$ |
|-----------|----------------------------------|------------------------------------|-----------------------------------|----------------------------------------------|----------------------------------------------|---------------------|
| D18       | 50.07                            | 101.68                             | 37.81                             | 0.36                                         | 37.56                                        |                     |
| AQx-2     | 35.53                            | 86.56                              | 42.00                             | 0.323                                        | 41.681                                       | 0.11K               |
| AQx-6     | 40.86                            | 94.06                              | 40.35                             | 0.004                                        | 40.34                                        | 0.04K               |
| AQx-8     | 41.37                            | 96.24                              | 40.61                             | 0.082                                        | 40.53                                        | 0.05K               |

**Supplementary Table 10.** The peak position and CCL of different peaks o of pristine AQx-2, AQx-6 and AQx-8 films.

| Film  | Direction | Q<br>( $\text{\AA}^{-1}$ ) | Stacking Distance<br>( $\text{\AA}$ ) | FWHM<br>( $\text{\AA}^{-1}$ ) | CCL<br>( $\text{\AA}$ ) |
|-------|-----------|----------------------------|---------------------------------------|-------------------------------|-------------------------|
| AQx-2 | IP        | 0.274                      | 22.920                                | 0.11                          | 51.38                   |
|       |           | 0.403                      | 15.583                                | 0.16                          | 35.55                   |
|       | OOP       | 1.240                      | 5.065                                 | 0.33                          | 17.13                   |
|       |           | 1.520                      | 4.132                                 | 1.21                          | 4.67                    |
|       |           | 1.743                      | 3.605                                 | 0.28                          | 20.48                   |
| AQx-6 | IP        | 0.368                      | 17.065                                | 0.19                          | 30.39                   |
|       |           | 1.230                      | 5.105                                 | 0.34                          | 16.62                   |
|       | OOP       | 1.436                      | 4.373                                 | 1.31                          | 4.3`                    |
|       |           | 1.737                      | 3.615                                 | 0.29                          | 19.76                   |
|       |           | AQx-8                      | IP                                    | 0.313                         | 20.064                  |
| 1.280 | 4.906     |                            |                                       | 0.47                          | 12.03                   |
| OOP   | 1.521     |                            | 4.129                                 | 0.785                         | 7.20                    |
|       | 1.704     |                            | 3.685                                 | 0.272                         | 20.779                  |

**Supplementary Table 11.** The peak position and CCL of different peaks o of D18:AQx-2, D18:AQx-6 and D18:AQx-8 blend films.

| Film      | Direction | Q<br>( $\text{\AA}^{-1}$ ) | Stacking Distance<br>( $\text{\AA}$ ) | FWHM<br>( $\text{\AA}^{-1}$ ) | CCL<br>( $\text{\AA}$ ) |
|-----------|-----------|----------------------------|---------------------------------------|-------------------------------|-------------------------|
| D18:AQx-2 |           | 0.303                      | 20.726                                | 0.08                          | 69.78                   |
|           |           | IP                         | 0.518                                 | 12.126                        | 0.22                    |
|           | OOP       | 1.250                      | 5.024                                 | 0.40                          | 14.13                   |
|           |           | 1.472                      | 4.266                                 | 0.94                          | 6.03                    |
|           |           | 1.715                      | 3.662                                 | 0.23                          | 25.01                   |
| D18:AQx-6 |           | 0.310                      | 20.258                                | 0.08                          | 75.36                   |
|           |           | IP                         | 0.543                                 | 11.565                        | 0.14                    |
|           | OOP       | 1.250                      | 5.024                                 | 0.40                          | 14.13                   |
|           |           | 1.450                      | 4.331                                 | 1.06                          | 5.35                    |
|           |           | 1.713                      | 3.666                                 | 0.28                          | 20.11                   |
| D18:AQx-8 |           | 0.341                      | 18.416                                | 0.16                          | 35.33                   |
|           |           | IP                         | 1.260                                 | 4.984                         | 0.40                    |
|           | OOP       | 1.455                      | 4.316                                 | 0.82                          | 6.893                   |
|           |           | 1.714                      | 3.664                                 | 0.32                          | 17.66                   |



**Supplementary Table 12.** Statistical sheet of PCE-  $\Delta E_{nr}$  data of bulk- heterojunction OSCs reported in recent year.

| Active layer          | $\Delta E_{nr}$<br>(eV) | PCE<br>(%) | Reference                                            |
|-----------------------|-------------------------|------------|------------------------------------------------------|
| PBDB-TF:AQx-2         | 0.22                    | 16.64      | <i>Adv. Mater.</i> <b>2020</b> , 32, 1906324.        |
| PM6:Y6                | 0.217                   | 16.00      | <i>Adv. Mater.</i> <b>2019</b> , 31, 1905645.        |
| S1:Y6                 | 0.23                    | 16.40      | <i>Energy Environ. Sci.</i> <b>2019</b> , 12, 3328.  |
| PBDB-TF:BTP-4Cl       | 0.206                   | 16.50      | <i>Nat. Commun.</i> <b>2019</b> , 10, 2515.          |
| ZR1:Y6                | 0.24                    | 14.34      | <i>Nat. Commun.</i> <b>2019</b> , 10, 5393.          |
| PM6:Y11(130)          | 0.201                   | 16.50      | <i>Nat. Photonics.</i> <b>2020</b> , 14, 300.        |
| PM6:Y11(150)          | 0.202                   | 16.54      |                                                      |
| PBQx-TF:eC9-2Cl       | 0.229                   | 17.7       | <i>Adv. Mater.</i> <b>2021</b> , 33, 2102420.        |
| PM6:BTP-S2            | 0.22                    | 16.37      | <i>Adv. Mater.</i> <b>2020</b> , 32, 2001160.        |
| PBDTT1Cl:Y18-1F       | 0.19                    | 17.1       | <i>Adv. Mater.</i> <b>2021</b> , 2105483.            |
| PTQ10:Y6              | 0.23                    | 16.21      | <i>Adv. Mater.</i> <b>2019</b> , 31, 1905480.        |
| PBDB-TF:BTP-eC9       | 0.227                   | 17.8       | <i>Adv. Mater.</i> <b>2020</b> , 1908205             |
| PM6:L8-BO             | 0.24                    | 18.32      | <i>Nat. Energy.</i> <b>2021</b> , 6, 605.            |
| PM6:BTP-S2            | 0.2067                  | 17.79      | <i>Energy Environ. Sci.</i> <b>2022</b> .            |
| PBDB-T-2F:BTP-4F-P3EH | 0.19                    | 18.22      | <i>Adv. Energy Mater.</i> <b>2021</b> , 11, 2102596. |
| PM6:BTP:C9-N4F        | 0.2                     | 17         | <i>Sol. RRL.</i> <b>2021</b> ,5, 2100008.            |
| PM6:BTP-S2            | 0.22                    | 16.37      | <i>Adv. Mater.</i> <b>2020</b> , 32, 2001160.        |
| PM6:AC9               | 0.238                   | 18.34      | <i>Adv. Funct. Mater.</i> <b>2022</b> , 2112511.     |
| PM6:BTP-eC9           | 0.251                   | 18.11      |                                                      |
| PM6:Qx-2              | 0.190                   | 18.22      | <i>Nat. Commun.</i> <b>2022</b> , 13, 3256.          |

|               |       |       |                                                             |
|---------------|-------|-------|-------------------------------------------------------------|
| PM6:CH6       | 0.23  | 18.33 | <i>Angew. Chem.Int. Ed.</i> 2022,61,<br>202209580.          |
| PM6:2BTP-2F-T | 0.199 | 18.18 | <i>Adv. Sci.</i> <b>2022</b> , 2202513.                     |
| PM6:AC9       | 0.243 | 18.43 | <i>Adv. Funct. Mater.</i> <b>2022</b> , 2112511.            |
| PM6:mPh4F-TS  | 0.213 | 18.05 | <i>Angew. Chem.Int. Ed.</i> <b>2022</b> ,61,<br>e2022.      |
| PM6:BOEH-4Cl  | 0.244 | 17.4  | <i>J. Mater. Chem. A</i> <b>2022</b> , 10, 21061–<br>21071. |
| PM6:BO-4Cl    | 0.229 | 17.43 | <i>Nat. Commun.</i> <b>2022</b> , 13, 2598.                 |
