# Supplementary material for: Suppressing electron-phonon coupling in organic photovoltaics for high-efficiency power conversion
Source: PubMed Central journal article supplement (PMC10442373; doi:10.1038/s41467-023-40806-9), 2023-08-21
Supplement: 41467_2023_40806_MOESM3_ESM.pdf [file 41467_2023_40806_MOESM3_ESM.pdf]

## Solar Cells Reporting Summary

Nature Research wishes to improve the reproducibility of the work that we publish. This form is intended for publication with all accepted papers reporting the characterization of photovoltaic devices and provides structure for consistency and transparency in reporting. Some list items might not apply to an individual manuscript, but all fields must be completed for clarity.

For further information on Nature Research policies, including our [data availability policy](#), see [Authors & Referees](#).

### ► Experimental design

#### Please check: are the following details reported in the manuscript?

##### 1. Dimensions

- Area of the tested solar cells  Yes  No 0.04 cm<sup>2</sup> in our lab and 0.03159 cm<sup>2</sup> in National Institute of Metrology (NIM), Chain.
- Method used to determine the device area  Yes  No Area of the tested solar cells in our lab is defined by optical microscope and area of the tested solar cells in NIM is defined by mask.

##### 2. Current-voltage characterization

- Current density-voltage (J-V) plots in both forward and backward direction  Yes  No We only scan the device in forward direction. Generally there is no difference between these two directions for organic solar cells.
- Voltage scan conditions  Yes  No Forward direction, the scan voltage from -1.5 to 1.5 V with a voltage step of 10 mV and delay time of 1 ms.  
*For instance: scan direction, speed, dwell times*
- Test environment  Yes  No Our devices were characterized at room temperature (ca. 25 Celsius degree) in glove box.  
*For instance: characterization temperature, in air or in glove box*
- Protocol for preconditioning of the device before its characterization  Yes  No No preconditioning protocol.
- Stability of the J-V characteristic  Yes  No Organic solar cells show no decay or instability during the test of J-V characteristics.  
*Verified with time evolution of the maximum power point or with the photocurrent at maximum power point; see ref. 7 for details.*

##### 3. Hysteresis or any other unusual behaviour

- Description of the unusual behaviour observed during the characterization  Yes  No No hysteresis or other unusual behaviour was observed during the characterization of the solar cells. In general, organic solar cells do not have hysteresis problems.
- Related experimental data  Yes  No No hysteresis or other unusual behaviour was observed during the characterization of the solar cells.

##### 4. Efficiency

- External quantum efficiency (EQE) or incident photons to current efficiency (IPCE)  Yes  No The EQE curves are shown in Figure 3b, which is obtained by the equipment of Enlitech (Taiwan) with a standard Si cell in air condition.
- A comparison between the integrated response under the standard reference spectrum and the response measure under the simulator  Yes  No The difference between the integrated current density from EQE and the short-circuit current density from J-V is within 5%.
- For tandem solar cells, the bias illumination and bias voltage used for each subcell  Yes  No Our devices were only fabricated for single-junction solar cells.

##### 5. Calibration

- Light source and reference cell or sensor used for the characterization  Yes  No The illumination of AM 1.5G (100mW cm<sup>-2</sup>) was achieved by a XES-70S1 solar simulator (SAN-EI Electric Co., Ltd., AAA grade, 70 mm × 70 mm photo-beam size).
- Confirmation that the reference cell was calibrated and certified  Yes  No The reference cell was calibrated and certified in NIM.

|                                                                                                                                                                                               |                                                                        |                                                                                                                                                      |
|-----------------------------------------------------------------------------------------------------------------------------------------------------------------------------------------------|------------------------------------------------------------------------|------------------------------------------------------------------------------------------------------------------------------------------------------|
| Calculation of spectral mismatch between the reference cell and the devices under test                                                                                                        | <input type="checkbox"/> Yes<br><input checked="" type="checkbox"/> No | The spectral mismatch factor was determined at National Institute of Metrology, China (NIM). We do not have the detailed information for the method. |
| 6. Mask/aperture                                                                                                                                                                              |                                                                        |                                                                                                                                                      |
| Size of the mask/aperture used during testing                                                                                                                                                 | <input type="checkbox"/> Yes<br><input checked="" type="checkbox"/> No | We did not use a mask during testing in our lab.                                                                                                     |
| Variation of the measured short-circuit current density with the mask/aperture area                                                                                                           | <input type="checkbox"/> Yes<br><input checked="" type="checkbox"/> No | We did not use a mask during testing in our lab.                                                                                                     |
| 7. Performance certification                                                                                                                                                                  |                                                                        |                                                                                                                                                      |
| Identity of the independent certification laboratory that confirmed the photovoltaic performance                                                                                              | <input checked="" type="checkbox"/> Yes<br><input type="checkbox"/> No | The certified PCE was obtained from the National Institute of Metrology (NIM), China.                                                                |
| A copy of any certificate(s)<br><i>Provide in Supplementary Information</i>                                                                                                                   | <input checked="" type="checkbox"/> Yes<br><input type="checkbox"/> No | Supplementary Figure 14                                                                                                                              |
| 8. Statistics                                                                                                                                                                                 |                                                                        |                                                                                                                                                      |
| Number of solar cells tested                                                                                                                                                                  | <input checked="" type="checkbox"/> Yes<br><input type="checkbox"/> No | The average PCE of the devices is obtained from ten independent devices.                                                                             |
| Statistical analysis of the device performance                                                                                                                                                | <input checked="" type="checkbox"/> Yes<br><input type="checkbox"/> No | We have given statistical data of device performance in Table 1.                                                                                     |
| 9. Long-term stability analysis                                                                                                                                                               |                                                                        |                                                                                                                                                      |
| Type of analysis, bias conditions and environmental conditions<br><i>For instance: illumination type, temperature, atmosphere humidity, encapsulation method, preconditioning temperature</i> | <input type="checkbox"/> Yes<br><input checked="" type="checkbox"/> No | We did not perform the long-term stability test.                                                                                                     |
